# Supplementary material for: Directionality and additivity effects of molecular acidity and aromaticity for substituted benzoic acids under external electric fields
Source: Royal Society of Chemistry journal article supplement (doi:10.1039/d3cp02982d), 2023-01-01
Supplement: d3cp02982d1.pdf [file d3cp02982d1.pdf]

*Supplementary Information for*

**Directionality and additivity effects of molecular acidity and aromaticity for substituted benzoic acids under external electric fields**

Meng Li,<sup>1</sup> Xinjie Wan,<sup>1</sup> Chunying Rong,<sup>\*1</sup> Dongbo Zhao,<sup>\*2</sup> and Shubin Liu<sup>\*3,4</sup>

<sup>1</sup> *Key Laboratory of Chemical Biology and Traditional Chinese Medicine Research (Ministry of Education of China), Hunan Normal University, Changsha, Hunan 410081, P.R. China. E-mail: rongchunying@aliyun.com*

<sup>2</sup> *Institute of Biomedical Research, Yunnan University, Kunming 650500, P. R. China. E-mail: dongbo@ynu.edu.cn*

<sup>3</sup> *Research Computing Center, University of North Carolina, Chapel Hill, NC 27599-3420, USA. E-mail: shubin@email.unc.edu*

<sup>4</sup> *Department of Chemistry, University of North Carolina, Chapel Hill, NC 27599-3290, USA*

**This PDF file includes:**

1. Table S1-S2. Calculated and fitted  $pK_a$  values using MEP results of the the acidic oxygen for doubly and triply cyano-substituted benzoic acid derivatives under external electric filed along x and y axes. Also shown are statistical analysis results for calculated and fitted  $pK_a$  values from MEP values on the acidic oxygen.
2. Table S3-S6. Calculated and fitted  $pK_a$  values using MEP results of the leaving protons for doubly and triply substituted benzoic acid derivatives(-F, -CN) under external electric filed along x and y axes. Also shown are statistical analysis results for calculated and fitted  $pK_a$  values from MEP values on leaving protons.
3. Table S7-S8. Calculated and fitted NICS(0) values for doubly and triply substituted benzoic acid derivatives under external electric filed along x-axis. Also shown are statistical analysis results in the bottom four rows of the table.
4. Table S9-S12. Calculated and fitted NICS(1) values for doubly and triply substituted benzoic acid derivatives under external electric filed. Also shown are statistical analysis results in the bottom four rows of the table.
5. Table S13-S16. Calculated and fitted  $pK_a$  values using MEP results of the acidic oxygen applying this sum rule in Eqs. (10) and (11) for doubly and triply substituted benzoic acid derivatives(-F, -CN) under external electric filed along x and y axes. Also shown are statistical analysis results for calculated and fitted  $pK_a$  values from MEP values on the acidic oxygen.
6. Table S17. Calculated and fitted NICS(0) values using the additivity effect for doubly and triply substituted benzoic acid derivatives under no external electric fields. Also shown are statistical analysis results in the bottom row of the table.
7. Table S18-S21. Calculated and fitted Shannon entropy values applying the general sum rule of Eqs. (10) and (11) for doubly and triply substituted benzoic acid derivatives under external electric filed along x and y axes. Also shown are statistical analysis results in the bottom four rows of the table.

8. Figure S1-S2. Profiles of calculated  $pK_a$  values using MEP from  $H_1$  in Scheme 1 for substituted benzoic acid derivatives as a function of the strength of the applied external electric field along x and y axes.
9. Figure S3-S6. Strong linear correlations of MEP values with NPA partial charges on  $O_1$  in Scheme 1 for substituted benzoic acid derivatives (-F, -CN) for when the external electric field is applied to any of the two directions.
10. Figure S7-S8. Profiles of the calculated aromaticity index, NICS(1), for singly, doubly, and triply substituted benzoic acid derivatives as a function of the strength of the applied external electric field along (a) x-axis; and (b) y-axis.
11. Figure S9-S10. Profiles of the total energy change as a function of the strength of the applied external electric field along x and y axes. The reference is the zero electric field.
12. Figure S11. Strong linear correlations of calculated and fitted NICS(0) values for doubly and triply substituted benzoic acid derivatives without an external electric field applied.

**Table S1.** Fitted  $pK_a$  values with the additivity effect for doubly and triply cyano-substituted benzoic acid derivatives under external electric field along x-axis in comparison with the calculated  $pK_a$  values using the (MEP) descriptor from the acidic oxygen. Also shown in the last few rows are statistical analysis results, including correlation coefficient  $R^2$ , mean squared error (MSE), root mean square error (RMSE), and mean absolute error (MAE) between the calculated and fitted  $pK_a$  values.

| EF    | 3,4-CN | 3,5-CN | 3,4,5-CN | Fitted 3,4-CN | Fitted 3,5-CN | Fitted 3,4,5-CN |
|-------|--------|--------|----------|---------------|---------------|-----------------|
| -250  | 0.483  | 0.134  | -0.357   | 0.943         | 0.780         | 0.780           |
| -225  | 0.659  | 0.347  | -0.151   | 1.138         | 0.995         | 0.993           |
| -200  | 0.834  | 0.557  | 0.053    | 1.331         | 1.208         | 1.204           |
| -175  | 1.007  | 0.764  | 0.255    | 1.521         | 1.417         | 1.411           |
| -150  | 1.180  | 0.969  | 0.456    | 1.710         | 1.624         | 1.617           |
| -125  | 1.351  | 1.172  | 0.655    | 1.897         | 1.828         | 1.820           |
| -100  | 1.521  | 1.373  | 0.854    | 2.082         | 2.030         | 2.021           |
| -75   | 1.690  | 1.572  | 1.052    | 2.265         | 2.230         | 2.220           |
| -50   | 1.859  | 1.770  | 1.249    | 2.447         | 2.428         | 2.418           |
| -25   | 2.027  | 1.966  | 1.445    | 2.628         | 2.624         | 2.614           |
| 0     | 2.194  | 2.162  | 1.642    | 2.807         | 2.819         | 2.809           |
| 25    | 2.361  | 2.356  | 1.838    | 2.986         | 3.012         | 3.003           |
| 50    | 2.528  | 2.550  | 2.034    | 3.163         | 3.204         | 3.196           |
| 75    | 2.694  | 2.743  | 2.230    | 3.340         | 3.395         | 3.387           |
| 100   | 2.860  | 2.936  | 2.426    | 3.516         | 3.585         | 3.578           |
| 125   | 3.026  | 3.128  | 2.623    | 3.691         | 3.774         | 3.769           |
| 150   | 3.192  | 3.319  | 2.820    | 3.866         | 3.962         | 3.959           |
| 175   | 3.358  | 3.511  | 3.018    | 4.040         | 4.150         | 4.148           |
| 200   | 3.524  | 3.702  | 3.217    | 4.215         | 4.337         | 4.338           |
| 225   | 3.691  | 3.893  | 3.416    | 4.389         | 4.523         | 4.527           |
| 250   | 3.858  | 4.083  | 3.618    | 4.564         | 4.709         | 4.717           |
| $R^2$ |        |        |          | 1.000         | 1.000         | 1.000           |
| MSE   |        |        |          | 0.368         | 0.421         | 1.322           |
| RMSE  |        |        |          | 0.606         | 0.649         | 1.150           |
| MAE   |        |        |          | 0.602         | 0.649         | 1.149           |

**Table S2.** Fitted  $pK_a$  values with the additivity effect for doubly and triply cyano-substituted benzoic acid derivatives under external electric field along y-axis in comparison with the calculated  $pK_a$  values using the (MEP) descriptor from the acidic oxygen. Also shown in the last few rows are statistical analysis results, including correlation coefficient  $R^2$ , mean squared error (MSE), root mean square error (RMSE), and mean absolute error (MAE) between the calculated and fitted  $pK_a$  values.

| EF    | 3,4-CN | 3,5-CN | 3,4,5-CN | Fitted 3,4-CN | Fitted 3,5-CN | Fitted 3,4,5-CN |
|-------|--------|--------|----------|---------------|---------------|-----------------|
| -250  | -1.071 | -0.832 | -1.703   | -0.131        | 0.073         | -0.027          |
| -225  | -0.703 | -0.501 | -1.333   | 0.198         | 0.374         | 0.286           |
| -200  | -0.348 | -0.180 | -0.973   | 0.516         | 0.667         | 0.589           |
| -175  | -0.004 | 0.133  | -0.624   | 0.824         | 0.952         | 0.885           |
| -150  | 0.330  | 0.439  | -0.283   | 1.124         | 1.232         | 1.173           |
| -125  | 0.655  | 0.739  | 0.051    | 1.417         | 1.506         | 1.456           |
| -100  | 0.973  | 1.033  | 0.378    | 1.704         | 1.775         | 1.733           |
| -75   | 1.285  | 1.321  | 0.700    | 1.985         | 2.040         | 2.007           |
| -50   | 1.592  | 1.605  | 1.017    | 2.262         | 2.302         | 2.276           |
| -25   | 1.895  | 1.885  | 1.331    | 2.536         | 2.562         | 2.544           |
| 0     | 2.194  | 2.162  | 1.642    | 2.807         | 2.819         | 2.809           |
| 25    | 2.492  | 2.436  | 1.951    | 3.077         | 3.074         | 3.074           |
| 50    | 2.788  | 2.707  | 2.259    | 3.346         | 3.329         | 3.338           |
| 75    | 3.085  | 2.977  | 2.569    | 3.616         | 3.584         | 3.603           |
| 100   | 3.384  | 3.247  | 2.880    | 3.887         | 3.839         | 3.870           |
| 125   | 3.687  | 3.516  | 3.195    | 4.161         | 4.096         | 4.140           |
| 150   | 3.995  | 3.786  | 3.515    | 4.440         | 4.355         | 4.415           |
| 175   | 4.311  | 4.058  | 3.843    | 4.725         | 4.617         | 4.695           |
| 200   | 4.639  | 4.333  | 4.181    | 5.019         | 4.883         | 4.982           |
| 225   | 4.981  | 4.611  | 4.534    | 5.323         | 5.154         | 5.278           |
| 250   | 5.341  | 4.893  | 4.903    | 5.640         | 5.430         | 5.586           |
| <hr/> |        |        |          |               |               |                 |
| $R^2$ |        |        |          | 1.000         | 1.000         | 1.000           |
| MSE   |        |        |          | 0.416         | 0.476         | 1.465           |
| RMSE  |        |        |          | 0.645         | 0.690         | 1.211           |
| MAE   |        |        |          | 0.618         | 0.681         | 1.175           |

**Table S3.** Fitted  $pK_a$  values with the additivity effect for doubly and triply fluorine-substituted benzoic acid derivatives under external electric field along x-axis in comparison with the calculated  $pK_a$  values using the (MEP) descriptor from the leaving protons. Also shown in the last few rows are statistical analysis results, including correlation coefficient  $R^2$ , mean squared error (MSE), root mean square error (RMSE), and mean absolute error (MAE) between the calculated and fitted  $pK_a$  values.

| EF    | 3,4-F | 3,5-F | 3,4,5-F | Fitted 3,4-F | Fitted 3,5-F | Fitted 3,4,5-F |
|-------|-------|-------|---------|--------------|--------------|----------------|
| -250  | 1.927 | 1.759 | 1.633   | 2.083        | 2.033        | 2.043          |
| -225  | 2.167 | 2.003 | 1.871   | 2.330        | 2.283        | 2.292          |
| -200  | 2.397 | 2.237 | 2.099   | 2.566        | 2.522        | 2.531          |
| -175  | 2.618 | 2.463 | 2.320   | 2.791        | 2.751        | 2.760          |
| -150  | 2.830 | 2.679 | 2.532   | 3.008        | 2.971        | 2.980          |
| -125  | 3.033 | 2.888 | 2.737   | 3.215        | 3.181        | 3.191          |
| -100  | 3.229 | 3.089 | 2.935   | 3.414        | 3.384        | 3.393          |
| -75   | 3.418 | 3.282 | 3.126   | 3.605        | 3.578        | 3.587          |
| -50   | 3.600 | 3.469 | 3.312   | 3.788        | 3.766        | 3.774          |
| -25   | 3.776 | 3.650 | 3.491   | 3.965        | 3.946        | 3.955          |
| 0     | 3.946 | 3.824 | 3.666   | 4.135        | 4.119        | 4.128          |
| 25    | 4.110 | 3.993 | 3.835   | 4.298        | 4.286        | 4.295          |
| 50    | 4.269 | 4.156 | 4.000   | 4.456        | 4.447        | 4.456          |
| 75    | 4.423 | 4.315 | 4.160   | 4.608        | 4.602        | 4.611          |
| 100   | 4.573 | 4.468 | 4.316   | 4.754        | 4.752        | 4.761          |
| 125   | 4.718 | 4.617 | 4.469   | 4.896        | 4.897        | 4.906          |
| 150   | 4.860 | 4.762 | 4.618   | 5.033        | 5.036        | 5.045          |
| 175   | 4.998 | 4.903 | 4.764   | 5.165        | 5.172        | 5.181          |
| 200   | 5.133 | 5.040 | 4.907   | 5.294        | 5.303        | 5.312          |
| 225   | 5.265 | 5.174 | 5.047   | 5.419        | 5.430        | 5.439          |
| 250   | 5.395 | 5.305 | 5.186   | 5.540        | 5.553        | 5.562          |
| $R^2$ |       |       |         | 1.000        | 1.000        | 1.000          |
| MSE   |       |       |         | 0.031        | 0.080        | 0.192          |
| RMSE  |       |       |         | 0.176        | 0.283        | 0.438          |
| MAE   |       |       |         | 0.175        | 0.283        | 0.437          |

**Table S4.** Fitted  $pK_a$  values with the additivity effect for doubly and triply fluorine-substituted benzoic acid derivatives under external electric field along y-axis in comparison with the calculated  $pK_a$  values using the (MEP) descriptor from the leaving protons. Also shown in the last few rows are statistical analysis results, including correlation coefficient  $R^2$ , mean squared error (MSE), root mean square error (RMSE), and mean absolute error (MAE) between the calculated and fitted  $pK_a$  values.

| <b>EF</b> | 3,4-F  | 3,5-F  | 3,4,5-F | Fitted 3,4-F | Fitted 3,5-F | Fitted 3,4,5-F |
|-----------|--------|--------|---------|--------------|--------------|----------------|
| -250      | -0.503 | -0.576 | -0.796  | -0.256       | -0.252       | -0.246         |
| -225      | -0.037 | -0.111 | -0.328  | 0.208        | 0.210        | 0.216          |
| -200      | 0.423  | 0.347  | 0.133   | 0.665        | 0.664        | 0.669          |
| -175      | 0.876  | 0.798  | 0.587   | 1.113        | 1.111        | 1.116          |
| -150      | 1.324  | 1.242  | 1.036   | 1.556        | 1.552        | 1.557          |
| -125      | 1.767  | 1.681  | 1.481   | 1.995        | 1.988        | 1.994          |
| -100      | 2.207  | 2.116  | 1.922   | 2.428        | 2.419        | 2.426          |
| -75       | 2.644  | 2.547  | 2.360   | 2.858        | 2.848        | 2.854          |
| -50       | 3.079  | 2.975  | 2.797   | 3.286        | 3.273        | 3.281          |
| -25       | 3.512  | 3.400  | 3.231   | 3.711        | 3.697        | 3.705          |
| 0         | 3.946  | 3.824  | 3.666   | 4.135        | 4.119        | 4.128          |
| 25        | 4.379  | 4.247  | 4.100   | 4.558        | 4.540        | 4.550          |
| 50        | 4.814  | 4.669  | 4.536   | 4.981        | 4.962        | 4.973          |
| 75        | 5.252  | 5.092  | 4.974   | 5.405        | 5.384        | 5.396          |
| 100       | 5.692  | 5.516  | 5.414   | 5.830        | 5.807        | 5.821          |
| 125       | 6.137  | 5.941  | 5.859   | 6.258        | 6.232        | 6.248          |
| 150       | 6.587  | 6.368  | 6.309   | 6.689        | 6.661        | 6.678          |
| 175       | 7.045  | 6.799  | 6.766   | 7.124        | 7.092        | 7.112          |
| 200       | 7.510  | 7.234  | 7.231   | 7.564        | 7.529        | 7.551          |
| 225       | 7.985  | 7.674  | 7.705   | 8.010        | 7.971        | 7.995          |
| 250       | 8.470  | 8.119  | 8.190   | 8.463        | 8.418        | 8.446          |
| $R^2$     |        |        |         | 1.000        | 1.000        | 1.000          |
| MSE       |        |        |         | 0.033        | 0.091        | 0.203          |
| RMSE      |        |        |         | 0.182        | 0.301        | 0.451          |
| MAE       |        |        |         | 0.166        | 0.301        | 0.443          |

**Table S5.** Calculated and fitted  $pK_a$  values using MEP results of the leaving protons for doubly and triply cyano-substituted benzoic acid derivatives under external electric field along x axis. Also shown are statistical analysis results for calculated and fitted  $pK_a$  values from MEP values on leaving protons.

| <b>EF</b> | <b>3,4-CN</b> | <b>3,5-CN</b> | <b>3,4,5-CN</b> | <b>Fitted 3,4-CN</b> | <b>Fitted 3,5-CN</b> | <b>Fitted 3,4,5-CN</b> |
|-----------|---------------|---------------|-----------------|----------------------|----------------------|------------------------|
| -250      | 1.411         | 1.002         | 0.560           | 1.840                | 1.638                | 1.665                  |
| -225      | 1.600         | 1.240         | 0.779           | 2.055                | 1.881                | 1.900                  |
| -200      | 1.782         | 1.467         | 0.990           | 2.262                | 2.114                | 2.127                  |
| -175      | 1.958         | 1.686         | 1.195           | 2.462                | 2.338                | 2.345                  |
| -150      | 2.129         | 1.896         | 1.395           | 2.653                | 2.553                | 2.555                  |
| -125      | 2.294         | 2.099         | 1.589           | 2.838                | 2.759                | 2.758                  |
| -100      | 2.455         | 2.296         | 1.779           | 3.017                | 2.958                | 2.954                  |
| -75       | 2.611         | 2.486         | 1.965           | 3.190                | 3.150                | 3.144                  |
| -50       | 2.764         | 2.671         | 2.147           | 3.358                | 3.336                | 3.328                  |
| -25       | 2.914         | 2.852         | 2.327           | 3.520                | 3.516                | 3.507                  |
| 0         | 3.061         | 3.028         | 2.504           | 3.679                | 3.690                | 3.681                  |
| 25        | 3.205         | 3.199         | 2.678           | 3.833                | 3.859                | 3.850                  |
| 50        | 3.347         | 3.367         | 2.851           | 3.983                | 4.023                | 4.016                  |
| 75        | 3.487         | 3.532         | 3.022           | 4.130                | 4.183                | 4.177                  |
| 100       | 3.625         | 3.693         | 3.191           | 4.273                | 4.338                | 4.334                  |
| 125       | 3.761         | 3.851         | 3.360           | 4.414                | 4.489                | 4.488                  |
| 150       | 3.896         | 4.007         | 3.527           | 4.551                | 4.636                | 4.639                  |
| 175       | 4.031         | 4.159         | 3.693           | 4.687                | 4.779                | 4.787                  |
| 200       | 4.164         | 4.308         | 3.859           | 4.820                | 4.919                | 4.932                  |
| 225       | 4.297         | 4.455         | 4.024           | 4.951                | 5.055                | 5.075                  |
| 250       | 4.430         | 4.599         | 4.188           | 5.081                | 5.189                | 5.216                  |
| $R^2$     |               |               |                 | 1.000                | 1.000                | 0.999                  |
| MSE       |               |               |                 | 0.352                | 0.414                | 1.292                  |
| RMSE      |               |               |                 | 0.594                | 0.644                | 1.137                  |
| MAE       |               |               |                 | 0.589                | 0.643                | 1.136                  |

**Table S6.** Calculated and fitted  $pK_a$  values using MEP results of the leaving protons for doubly and triply cyano-substituted benzoic acid derivatives under external electric field along y axis. Also shown are statistical analysis results for calculated and fitted  $pK_a$  values from MEP values on leaving protons.

| EF             | 3,4-CN | 3,5-CN | 3,4,5-CN | Fitted 3,4-CN | Fitted 3,5-CN | Fitted 3,4,5-CN |
|----------------|--------|--------|----------|---------------|---------------|-----------------|
| -250           | -2.056 | -1.827 | -2.704   | -1.114        | -0.912        | -1.014          |
| -225           | -1.500 | -1.307 | -2.143   | -0.597        | -0.424        | -0.513          |
| -200           | -0.958 | -0.797 | -1.595   | -0.092        | 0.056         | -0.022          |
| -175           | -0.428 | -0.297 | -1.058   | 0.403         | 0.528         | 0.460           |
| -150           | 0.091  | 0.195  | -0.531   | 0.888         | 0.993         | 0.935           |
| -125           | 0.601  | 0.680  | -0.011   | 1.366         | 1.453         | 1.403           |
| -100           | 1.104  | 1.159  | 0.501    | 1.837         | 1.907         | 1.866           |
| -75            | 1.600  | 1.633  | 1.008    | 2.303         | 2.357         | 2.324           |
| -50            | 2.091  | 2.102  | 1.510    | 2.765         | 2.804         | 2.779           |
| -25            | 2.577  | 2.566  | 2.008    | 3.223         | 3.248         | 3.231           |
| 0              | 3.061  | 3.028  | 2.504    | 3.679         | 3.690         | 3.681           |
| 25             | 3.542  | 3.486  | 2.997    | 4.133         | 4.130         | 4.130           |
| 50             | 4.023  | 3.942  | 3.490    | 4.586         | 4.569         | 4.579           |
| 75             | 4.505  | 4.397  | 3.984    | 5.041         | 5.008         | 5.028           |
| 100            | 4.989  | 4.851  | 4.480    | 5.497         | 5.448         | 5.480           |
| 125            | 5.476  | 5.304  | 4.979    | 5.956         | 5.889         | 5.934           |
| 150            | 5.970  | 5.759  | 5.484    | 6.420         | 6.332         | 6.392           |
| 175            | 6.473  | 6.216  | 5.997    | 6.890         | 6.777         | 6.856           |
| 200            | 6.986  | 6.674  | 6.520    | 7.369         | 7.227         | 7.327           |
| 225            | 7.515  | 7.137  | 7.056    | 7.858         | 7.681         | 7.807           |
| 250            | 8.062  | 7.603  | 7.611    | 8.360         | 8.141         | 8.298           |
| R <sup>2</sup> |        |        |          | 1.000         | 1.000         | 1.000           |
| MSE            |        |        |          | 0.420         | 0.484         | 1.488           |
| RMSE           |        |        |          | 0.648         | 0.695         | 1.220           |
| MAE            |        |        |          | 0.621         | 0.686         | 1.184           |



**Table S7.** Calculated and fitted NICS(0) values for doubly and triply fluorine-substituted benzoic acid derivatives under external electric field along x-axis. Also shown are statistical analysis results in the bottom four rows of the table.

| <b>EF</b>            | <b>3,4-F</b> | <b>3,5-F</b> | <b>3,4,5-F</b> | <b>Fitted 3,4-F</b> | <b>Fitted 3,5-F</b> | <b>Fitted 3,4,5-F</b> |
|----------------------|--------------|--------------|----------------|---------------------|---------------------|-----------------------|
| -250                 | -10.496      | -10.969      | -12.744        | -10.016             | -11.421             | -12.748               |
| -225                 | -10.539      | -10.985      | -12.753        | -10.082             | -11.422             | -12.745               |
| -200                 | -10.581      | -11.001      | -12.762        | -10.146             | -11.425             | -12.745               |
| -175                 | -10.621      | -11.015      | -12.769        | -10.206             | -11.429             | -12.746               |
| -150                 | -10.659      | -11.028      | -12.776        | -10.265             | -11.435             | -12.748               |
| -125                 | -10.697      | -11.040      | -12.783        | -10.322             | -11.440             | -12.751               |
| -100                 | -10.734      | -11.050      | -12.789        | -10.377             | -11.445             | -12.755               |
| -75                  | -10.770      | -11.059      | -12.795        | -10.431             | -11.451             | -12.758               |
| -50                  | -10.805      | -11.067      | -12.800        | -10.483             | -11.456             | -12.762               |
| -25                  | -10.841      | -11.073      | -12.804        | -10.535             | -11.461             | -12.766               |
| 0                    | -10.876      | -11.077      | -12.809        | -10.586             | -11.465             | -12.770               |
| 25                   | -10.910      | -11.080      | -12.813        | -10.636             | -11.469             | -12.774               |
| 50                   | -10.945      | -11.081      | -12.816        | -10.686             | -11.473             | -12.778               |
| 75                   | -10.981      | -11.081      | -12.819        | -10.736             | -11.476             | -12.783               |
| 100                  | -11.016      | -11.079      | -12.822        | -10.786             | -11.480             | -12.788               |
| 125                  | -11.052      | -11.076      | -12.825        | -10.837             | -11.484             | -12.794               |
| 150                  | -11.090      | -11.072      | -12.828        | -10.889             | -11.487             | -12.800               |
| 175                  | -11.128      | -11.067      | -12.830        | -10.942             | -11.492             | -12.808               |
| 200                  | -11.167      | -11.060      | -12.832        | -10.997             | -11.497             | -12.817               |
| 225                  | -11.208      | -11.054      | -12.834        | -11.054             | -11.505             | -12.829               |
| 250                  | -11.251      | -11.047      | -12.836        | -11.115             | -11.516             | -12.845               |
| <b>R<sup>2</sup></b> |              |              |                | 1.000               | 0.490               | 0.762                 |
| <b>MSE</b>           |              |              |                | 0.098               | 0.171               | 0.001                 |
| <b>RMSE</b>          |              |              |                | 0.314               | 0.414               | 0.029                 |
| <b>MAE</b>           |              |              |                | 0.297               | 0.413               | 0.026                 |

**Table S8.** Calculated and fitted NICS(0) values for doubly and triply cyano-substituted benzoic acid derivatives under external electric field along x-axis. Also shown are statistical analysis results in the bottom four rows of the table.

| EF             | 3,4-CN | 3,5-CN | 3,4,5-CN | Fitted 3,4-CN | Fitted 3,5-CN | Fitted 3,4,5-CN |
|----------------|--------|--------|----------|---------------|---------------|-----------------|
| -250           | -7.849 | -7.821 | -8.169   | -8.008        | -7.655        | -8.357          |
| -225           | -7.919 | -7.912 | -8.265   | -8.049        | -7.718        | -8.410          |
| -200           | -7.978 | -7.989 | -8.345   | -8.085        | -7.780        | -8.463          |
| -175           | -8.028 | -8.054 | -8.412   | -8.114        | -7.833        | -8.507          |
| -150           | -8.069 | -8.108 | -8.467   | -8.143        | -7.877        | -8.547          |
| -125           | -8.103 | -8.153 | -8.511   | -8.163        | -7.913        | -8.577          |
| -100           | -8.131 | -8.189 | -8.547   | -8.180        | -7.943        | -8.600          |
| -75            | -8.154 | -8.217 | -8.574   | -8.194        | -7.966        | -8.618          |
| -50            | -8.172 | -8.238 | -8.594   | -8.205        | -7.983        | -8.631          |
| -25            | -8.185 | -8.251 | -8.606   | -8.213        | -7.995        | -8.640          |
| 0              | -8.195 | -8.258 | -8.612   | -8.219        | -8.001        | -8.645          |
| 25             | -8.201 | -8.258 | -8.611   | -8.224        | -8.001        | -8.646          |
| 50             | -8.204 | -8.251 | -8.604   | -8.226        | -7.996        | -8.642          |
| 75             | -8.204 | -8.237 | -8.590   | -8.226        | -7.986        | -8.635          |
| 100            | -8.200 | -8.216 | -8.568   | -8.224        | -7.970        | -8.623          |
| 125            | -8.194 | -8.187 | -8.539   | -8.219        | -7.947        | -8.607          |
| 150            | -8.184 | -8.149 | -8.502   | -8.234        | -7.940        | -8.607          |
| 175            | -8.171 | -8.102 | -8.454   | -8.224        | -7.904        | -8.579          |
| 200            | -8.153 | -8.044 | -8.395   | -8.210        | -7.860        | -8.545          |
| 225            | -8.132 | -7.974 | -8.323   | -8.165        | -7.806        | -8.476          |
| 250            | -8.105 | -7.890 | -8.235   | -8.142        | -7.743        | -8.423          |
| R <sup>2</sup> |        |        |          | 0.979         | 0.983         | 0.971           |
| MSE            |        |        |          | 0.004         | 0.051         | 0.010           |
| RMSE           |        |        |          | 0.065         | 0.225         | 0.102           |
| MAE            |        |        |          | 0.054         | 0.223         | 0.088           |

**Table S9.** Calculated and fitted NICS(1) values for doubly and triply fluorine-substituted benzoic acid derivatives under external electric field along x-axis. Also shown are statistical analysis results in the bottom four rows of the table.

| <b>EF</b>            | <b>3,4-F</b> | <b>3,5-F</b> | <b>3,4,5-F</b> | <b>Fitted 3,4-F</b> | <b>Fitted 3,5-F</b> | <b>Fitted 3,4,5-F</b> |
|----------------------|--------------|--------------|----------------|---------------------|---------------------|-----------------------|
| -250                 | -9.874       | -9.900       | -10.237        | -9.628              | -10.101             | -10.015               |
| -225                 | -9.907       | -9.926       | -10.253        | -9.674              | -10.116             | -10.027               |
| -200                 | -9.939       | -9.949       | -10.268        | -9.717              | -10.130             | -10.039               |
| -175                 | -9.968       | -9.969       | -10.281        | -9.757              | -10.143             | -10.050               |
| -150                 | -9.996       | -9.987       | -10.292        | -9.795              | -10.155             | -10.060               |
| -125                 | -10.022      | -10.002      | -10.301        | -9.831              | -10.165             | -10.069               |
| -100                 | -10.046      | -10.014      | -10.308        | -9.865              | -10.174             | -10.076               |
| -75                  | -10.069      | -10.023      | -10.314        | -9.896              | -10.180             | -10.081               |
| -50                  | -10.090      | -10.030      | -10.318        | -9.926              | -10.185             | -10.085               |
| -25                  | -10.111      | -10.034      | -10.321        | -9.954              | -10.189             | -10.088               |
| 0                    | -10.130      | -10.035      | -10.321        | -9.981              | -10.190             | -10.089               |
| 25                   | -10.147      | -10.034      | -10.321        | -10.006             | -10.190             | -10.089               |
| 50                   | -10.164      | -10.030      | -10.319        | -10.029             | -10.188             | -10.087               |
| 75                   | -10.180      | -10.024      | -10.315        | -10.052             | -10.184             | -10.084               |
| 100                  | -10.195      | -10.014      | -10.309        | -10.073             | -10.179             | -10.079               |
| 125                  | -10.210      | -10.003      | -10.302        | -10.093             | -10.171             | -10.072               |
| 150                  | -10.223      | -9.988       | -10.293        | -10.112             | -10.162             | -10.065               |
| 175                  | -10.236      | -9.971       | -10.283        | -10.131             | -10.152             | -10.056               |
| 200                  | -10.248      | -9.950       | -10.270        | -10.149             | -10.140             | -10.046               |
| 225                  | -10.259      | -9.928       | -10.256        | -10.167             | -10.127             | -10.035               |
| 250                  | -10.270      | -9.902       | -10.240        | -10.185             | -10.113             | -10.024               |
| <b>R<sup>2</sup></b> |              |              |                | <b>1.000</b>        | <b>0.985</b>        | <b>0.992</b>          |
| <b>MSE</b>           |              |              |                | <b>0.026</b>        | <b>0.030</b>        | <b>0.052</b>          |
| <b>RMSE</b>          |              |              |                | <b>0.162</b>        | <b>0.173</b>        | <b>0.229</b>          |
| <b>MAE</b>           |              |              |                | <b>0.155</b>        | <b>0.173</b>        | <b>0.229</b>          |

**Table S10.** Calculated and fitted NICS(1) values for doubly and triply fluorine-substituted benzoic acid derivatives under external electric field along y-axis. Also shown are statistical analysis results in the bottom four rows of the table.

| <b>EF</b>            | <b>3,4-F</b> | <b>3,5-F</b> | <b>3,4,5-F</b> | <b>Fitted 3,4-F</b> | <b>Fitted 3,5-F</b> | <b>Fitted 3,4,5-F</b> |
|----------------------|--------------|--------------|----------------|---------------------|---------------------|-----------------------|
| -250                 | -10.531      | -10.162      | -10.782        | -10.294             | -10.316             | -10.502               |
| -225                 | -10.502      | -10.169      | -10.743        | -10.294             | -10.336             | -10.498               |
| -200                 | -10.472      | -10.170      | -10.703        | -10.276             | -10.335             | -10.466               |
| -175                 | -10.441      | -10.167      | -10.663        | -10.253             | -10.329             | -10.431               |
| -150                 | -10.407      | -10.159      | -10.622        | -10.227             | -10.319             | -10.392               |
| -125                 | -10.370      | -10.148      | -10.579        | -10.197             | -10.306             | -10.351               |
| -100                 | -10.331      | -10.132      | -10.533        | -10.164             | -10.289             | -10.306               |
| -75                  | -10.287      | -10.113      | -10.485        | -10.125             | -10.269             | -10.258               |
| -50                  | -10.240      | -10.090      | -10.434        | -10.083             | -10.246             | -10.206               |
| -25                  | -10.187      | -10.065      | -10.379        | -10.034             | -10.220             | -10.150               |
| 0                    | -10.130      | -10.035      | -10.321        | -9.981              | -10.190             | -10.089               |
| 25                   | -10.066      | -10.002      | -10.259        | -9.920              | -10.158             | -10.024               |
| 50                   | -9.994       | -9.965       | -10.191        | -9.853              | -10.121             | -9.953                |
| 75                   | -9.914       | -9.924       | -10.117        | -9.778              | -10.081             | -9.875                |
| 100                  | -9.824       | -9.877       | -10.036        | -9.692              | -10.036             | -9.790                |
| 125                  | -9.721       | -9.825       | -9.944         | -9.595              | -9.985              | -9.696                |
| 150                  | -9.604       | -9.766       | -9.842         | -9.484              | -9.928              | -9.590                |
| 175                  | -9.469       | -9.699       | -9.725         | -9.357              | -9.862              | -9.472                |
| 200                  | -9.312       | -9.622       | -9.591         | -9.211              | -9.787              | -9.338                |
| 225                  | -9.129       | -9.532       | -9.435         | -9.042              | -9.699              | -9.185                |
| 250                  | -8.916       | -9.427       | -9.252         | -8.844              | -9.594              | -9.007                |
| <b>R<sup>2</sup></b> |              |              |                | <b>0.999</b>        | <b>1.000</b>        | <b>0.999</b>          |
| <b>MSE</b>           |              |              |                | <b>0.023</b>        | <b>0.026</b>        | <b>0.058</b>          |
| <b>RMSE</b>          |              |              |                | <b>0.155</b>        | <b>0.160</b>        | <b>0.241</b>          |
| <b>MAE</b>           |              |              |                | <b>0.150</b>        | <b>0.160</b>        | <b>0.241</b>          |

**Table S11.** Calculated and fitted NICS(1) values for doubly and triply cyano-substituted benzoic acid derivatives under external electric field along x-axis. Also shown are statistical analysis results in the bottom four rows of the table.

| EF             | 3,4-CN  | 3,5-CN  | 3,4,5-CN | Fitted 3,4-CN | Fitted 3,5-CN | Fitted 3,4,5-CN |
|----------------|---------|---------|----------|---------------|---------------|-----------------|
| -250           | -9.567  | -9.704  | -9.558   | -9.739        | -9.782        | -9.792          |
| -225           | -9.649  | -9.777  | -9.644   | -9.799        | -9.828        | -9.847          |
| -200           | -9.719  | -9.838  | -9.716   | -9.852        | -9.878        | -9.905          |
| -175           | -9.779  | -9.889  | -9.776   | -9.897        | -9.919        | -9.953          |
| -150           | -9.830  | -9.931  | -9.825   | -9.936        | -9.954        | -9.994          |
| -125           | -9.873  | -9.966  | -9.865   | -9.970        | -9.982        | -10.027         |
| -100           | -9.909  | -9.993  | -9.897   | -9.998        | -10.005       | -10.052         |
| -75            | -9.939  | -10.013 | -9.920   | -10.022       | -10.021       | -10.071         |
| -50            | -9.964  | -10.027 | -9.937   | -10.041       | -10.033       | -10.085         |
| -25            | -9.983  | -10.035 | -9.946   | -10.055       | -10.040       | -10.092         |
| 0              | -9.998  | -10.037 | -9.948   | -10.066       | -10.042       | -10.094         |
| 25             | -10.009 | -10.033 | -9.943   | -10.072       | -10.039       | -10.090         |
| 50             | -10.015 | -10.023 | -9.931   | -10.075       | -10.031       | -10.080         |
| 75             | -10.017 | -10.008 | -9.913   | -10.073       | -10.019       | -10.065         |
| 100            | -10.015 | -9.985  | -9.886   | -10.067       | -10.001       | -10.044         |
| 125            | -10.008 | -9.956  | -9.852   | -10.057       | -9.977        | -10.016         |
| 150            | -9.998  | -9.919  | -9.810   | -10.055       | -9.960        | -9.994          |
| 175            | -9.982  | -9.875  | -9.757   | -10.036       | -9.924        | -9.953          |
| 200            | -9.962  | -9.821  | -9.694   | -10.011       | -9.880        | -9.903          |
| 225            | -9.937  | -9.756  | -9.619   | -9.983        | -9.828        | -9.845          |
| 250            | -9.906  | -9.680  | -9.529   | -9.947        | -9.766        | -9.775          |
| R <sup>2</sup> |         |         |          | 0.981         | 0.996         | 0.998           |
| MSE            |         |         |          | 0.008         | 0.002         | 0.032           |
| RMSE           |         |         |          | 0.088         | 0.040         | 0.179           |
| MAE            |         |         |          | 0.081         | 0.031         | 0.177           |

**Table S12.** Calculated and fitted NICS(1) values for doubly and triply cyano-substituted benzoic acid derivatives under external electric field along y-axis. Also shown are statistical analysis results in the bottom four rows of the table.

| EF             | 3,4-CN  | 3,5-CN  | 3,4,5-CN | Fitted 3,4-CN | Fitted 3,5-CN | Fitted 3,4,5-CN |
|----------------|---------|---------|----------|---------------|---------------|-----------------|
| -250           | -10.039 | -9.977  | -10.133  | -9.890        | -9.943        | -9.877          |
| -225           | -10.071 | -10.013 | -10.143  | -9.975        | -9.994        | -9.982          |
| -200           | -10.093 | -10.042 | -10.147  | -10.036       | -10.021       | -10.043         |
| -175           | -10.108 | -10.065 | -10.145  | -10.079       | -10.049       | -10.092         |
| -150           | -10.114 | -10.080 | -10.135  | -10.100       | -10.059       | -10.117         |
| -125           | -10.114 | -10.090 | -10.121  | -10.118       | -10.072       | -10.140         |
| -100           | -10.106 | -10.092 | -10.100  | -10.127       | -10.078       | -10.151         |
| -75            | -10.090 | -10.088 | -10.072  | -10.126       | -10.078       | -10.152         |
| -50            | -10.068 | -10.078 | -10.038  | -10.115       | -10.072       | -10.142         |
| -25            | -10.037 | -10.060 | -9.997   | -10.095       | -10.060       | -10.123         |
| 0              | -9.998  | -10.037 | -9.948   | -10.066       | -10.042       | -10.094         |
| 25             | -9.951  | -10.008 | -9.891   | -10.026       | -10.018       | -10.054         |
| 50             | -9.893  | -9.972  | -9.826   | -9.976        | -9.988        | -10.004         |
| 75             | -9.828  | -9.930  | -9.750   | -9.912        | -9.951        | -9.941          |
| 100            | -9.746  | -9.881  | -9.663   | -9.847        | -9.919        | -9.877          |
| 125            | -9.648  | -9.824  | -9.562   | -9.751        | -9.866        | -9.783          |
| 150            | -9.530  | -9.757  | -9.444   | -9.633        | -9.804        | -9.669          |
| 175            | -9.388  | -9.680  | -9.305   | -9.489        | -9.731        | -9.530          |
| 200            | -9.217  | -9.592  | -9.142   | -9.312        | -9.659        | -9.376          |
| 225            | -9.010  | -9.490  | -8.949   | -9.094        | -9.558        | -9.169          |
| 250            | -8.755  | -9.371  | -8.719   | -8.831        | -9.439        | -8.920          |
| R <sup>2</sup> |         |         |          | 0.973         | 0.994         | 0.914           |
| MSE            |         |         |          | 0.006         | 0.001         | 0.028           |
| RMSE           |         |         |          | 0.079         | 0.035         | 0.169           |
| MAE            |         |         |          | 0.071         | 0.028         | 0.152           |

**Table S13.** Calculated and fitted  $pK_a$  values using MEP results of the acidic oxygen applying this sum rule in Eqs. (10) and (11) for doubly and triply fluorine-substituted benzoic acid derivatives under external electric field along x axis. Also shown are statistical analysis results in the bottom four rows of the table.

| <b>EF</b>      | 3,4-F | 3,5-F | 3,4,5-F | Fitted 3,4-F | Fitted 3,5-F | Fitted 3,4,5-F |
|----------------|-------|-------|---------|--------------|--------------|----------------|
| -250           | 1.085 | 0.930 | 0.779   | 0.897        | 0.620        | 0.287          |
| -225           | 1.295 | 1.141 | 0.990   | 1.124        | 0.857        | 0.540          |
| -200           | 1.501 | 1.351 | 1.198   | 1.348        | 1.091        | 0.789          |
| -175           | 1.706 | 1.558 | 1.404   | 1.570        | 1.321        | 1.036          |
| -150           | 1.907 | 1.762 | 1.608   | 1.788        | 1.550        | 1.280          |
| -125           | 2.106 | 1.965 | 1.810   | 2.004        | 1.775        | 1.522          |
| -100           | 2.304 | 2.165 | 2.010   | 2.218        | 1.999        | 1.761          |
| -75            | 2.499 | 2.364 | 2.209   | 2.430        | 2.220        | 1.999          |
| -50            | 2.692 | 2.561 | 2.406   | 2.639        | 2.440        | 2.234          |
| -25            | 2.884 | 2.757 | 2.601   | 2.847        | 2.658        | 2.468          |
| 0              | 3.074 | 2.951 | 2.796   | 3.053        | 2.874        | 2.699          |
| 25             | 3.262 | 3.144 | 2.989   | 3.257        | 3.088        | 2.930          |
| 50             | 3.450 | 3.335 | 3.182   | 3.459        | 3.301        | 3.159          |
| 75             | 3.636 | 3.526 | 3.373   | 3.661        | 3.513        | 3.387          |
| 100            | 3.821 | 3.715 | 3.564   | 3.861        | 3.723        | 3.613          |
| 125            | 4.005 | 3.904 | 3.754   | 4.061        | 3.933        | 3.840          |
| 150            | 4.189 | 4.092 | 3.944   | 4.259        | 4.142        | 4.065          |
| 175            | 4.373 | 4.280 | 4.134   | 4.457        | 4.350        | 4.290          |
| 200            | 4.556 | 4.467 | 4.324   | 4.655        | 4.558        | 4.514          |
| 225            | 4.739 | 4.654 | 4.514   | 4.852        | 4.765        | 4.739          |
| 250            | 4.923 | 4.842 | 4.704   | 5.050        | 4.973        | 4.965          |
| -----          |       |       |         |              |              |                |
| R <sup>2</sup> |       |       |         | 1.000        | 1.000        | 1.000          |
| MSE            |       |       |         | 0.010        | 0.024        | 0.062          |
| RMSE           |       |       |         | 0.099        | 0.156        | 0.249          |
| MAE            |       |       |         | 0.084        | 0.128        | 0.208          |

**Table S14.** Calculated and fitted  $pK_a$  values using MEP results of the acidic oxygen applying this sum rule in Eqs. (10) and (11) for doubly and triply fluorine-substituted benzoic acid derivatives under external electric field along y axis. Also shown are statistical analysis results in the bottom four rows of the table.

| EF             | 3,4-F | 3,5-F | 3,4,5-F | Fitted 3,4-F | Fitted 3,5-F | Fitted 3,4,5-F |
|----------------|-------|-------|---------|--------------|--------------|----------------|
| -250           | 0.481 | 0.412 | 0.193   | 0.264        | 0.062        | -0.357         |
| -225           | 0.759 | 0.688 | 0.473   | 0.561        | 0.364        | -0.037         |
| -200           | 1.032 | 0.959 | 0.746   | 0.855        | 0.663        | 0.286          |
| -175           | 1.299 | 1.222 | 1.014   | 1.143        | 0.954        | 0.601          |
| -150           | 1.560 | 1.480 | 1.277   | 1.426        | 1.240        | 0.911          |
| -125           | 1.818 | 1.733 | 1.536   | 1.704        | 1.521        | 1.217          |
| -100           | 2.073 | 1.982 | 1.791   | 1.978        | 1.798        | 1.518          |
| -75            | 2.325 | 2.228 | 2.045   | 2.249        | 2.071        | 1.816          |
| -50            | 2.576 | 2.471 | 2.296   | 2.518        | 2.341        | 2.112          |
| -25            | 2.825 | 2.712 | 2.546   | 2.786        | 2.608        | 2.406          |
| 0              | 3.074 | 2.951 | 2.796   | 3.053        | 2.874        | 2.699          |
| 25             | 3.323 | 3.189 | 3.046   | 3.319        | 3.138        | 2.993          |
| 50             | 3.573 | 3.427 | 3.297   | 3.587        | 3.403        | 3.287          |
| 75             | 3.826 | 3.665 | 3.551   | 3.856        | 3.668        | 3.583          |
| 100            | 4.082 | 3.904 | 3.807   | 4.129        | 3.934        | 3.882          |
| 125            | 4.343 | 4.145 | 4.068   | 4.405        | 4.202        | 4.185          |
| 150            | 4.609 | 4.388 | 4.334   | 4.686        | 4.473        | 4.494          |
| 175            | 4.881 | 4.635 | 4.607   | 4.973        | 4.748        | 4.809          |
| 200            | 5.162 | 4.886 | 4.888   | 5.268        | 5.027        | 5.132          |
| 225            | 5.453 | 5.142 | 5.179   | 5.571        | 5.313        | 5.464          |
| 250            | 5.754 | 5.404 | 5.481   | 5.884        | 5.606        | 5.806          |
| R <sup>2</sup> |       |       |         | 1.000        | 1.000        | 1.000          |
| MSE            |       |       |         | 0.012        | 0.033        | 0.081          |
| RMSE           |       |       |         | 0.111        | 0.182        | 0.285          |
| MAE            |       |       |         | 0.094        | 0.153        | 0.240          |



**Table S15.** Calculated and fitted  $pK_a$  values using MEP results of the acidic oxygen applying this sum rule in Eqs. (10) and (11) for doubly and triply cyano-substituted benzoic acid derivatives under external electric field along x axis. Also shown are statistical analysis results in the bottom four rows of the table.

| EF             | 3,4-CN | 3,5-CN | 3,4,5-CN | Fitted 3,4-CN | Fitted 3,5-CN | Fitted 3,4,5-CN |
|----------------|--------|--------|----------|---------------|---------------|-----------------|
| -250           | 0.483  | 0.134  | -0.357   | 0.273         | 0.240         | -0.743          |
| -225           | 0.659  | 0.347  | -0.151   | 0.470         | 0.467         | -0.502          |
| -200           | 0.834  | 0.557  | 0.053    | 0.666         | 0.691         | -0.264          |
| -175           | 1.007  | 0.764  | 0.255    | 0.860         | 0.911         | -0.028          |
| -150           | 1.180  | 0.969  | 0.456    | 1.052         | 1.129         | 0.206           |
| -125           | 1.351  | 1.172  | 0.655    | 1.243         | 1.344         | 0.439           |
| -100           | 1.521  | 1.373  | 0.854    | 1.434         | 1.557         | 0.671           |
| -75            | 1.690  | 1.572  | 1.052    | 1.623         | 1.769         | 0.901           |
| -50            | 1.859  | 1.770  | 1.249    | 1.811         | 1.978         | 1.131           |
| -25            | 2.027  | 1.966  | 1.445    | 1.999         | 2.186         | 1.360           |
| 0              | 2.194  | 2.162  | 1.642    | 2.186         | 2.392         | 1.588           |
| 25             | 2.361  | 2.356  | 1.838    | 2.373         | 2.598         | 1.817           |
| 50             | 2.528  | 2.550  | 2.034    | 2.559         | 2.802         | 2.045           |
| 75             | 2.694  | 2.743  | 2.230    | 2.745         | 3.006         | 2.274           |
| 100            | 2.860  | 2.936  | 2.426    | 2.931         | 3.208         | 2.503           |
| 125            | 3.026  | 3.128  | 2.623    | 3.118         | 3.410         | 2.733           |
| 150            | 3.192  | 3.319  | 2.820    | 3.304         | 3.611         | 2.963           |
| 175            | 3.358  | 3.511  | 3.018    | 3.491         | 3.812         | 3.194           |
| 200            | 3.524  | 3.702  | 3.217    | 3.678         | 4.013         | 3.427           |
| 225            | 3.691  | 3.893  | 3.416    | 3.867         | 4.213         | 3.661           |
| 250            | 3.858  | 4.083  | 3.618    | 4.057         | 4.413         | 3.897           |
| R <sup>2</sup> |        |        |          | 1.000         | 1.000         | 1.000           |
| MSE            |        |        |          | 0.015         | 0.056         | 0.043           |
| RMSE           |        |        |          | 0.122         | 0.236         | 0.207           |
| MAE            |        |        |          | 0.106         | 0.226         | 0.177           |

**Table S16.** Calculated and fitted  $pK_a$  values using MEP results of the acidic oxygen applying this sum rule in Eqs. (10) and (11) for doubly and triply cyano-substituted benzoic acid derivatives under external electric field along y axis. Also shown are statistical analysis results in the bottom four rows of the table.

| EF             | 3,4-CN | 3,5-CN | 3,4,5-CN | Fitted 3,4-CN | Fitted 3,5-CN | Fitted 3,4,5-CN |
|----------------|--------|--------|----------|---------------|---------------|-----------------|
| -250           | -1.071 | -0.832 | -1.703   | -1.326        | -0.638        | -2.226          |
| -225           | -0.703 | -0.501 | -1.333   | -0.931        | -0.307        | -1.807          |
| -200           | -0.348 | -0.180 | -0.973   | -0.546        | 0.017         | -1.393          |
| -175           | -0.004 | 0.133  | -0.624   | -0.175        | 0.333         | -0.992          |
| -150           | 0.330  | 0.439  | -0.283   | 0.185         | 0.642         | -0.602          |
| -125           | 0.655  | 0.739  | 0.051    | 0.535         | 0.945         | -0.221          |
| -100           | 0.973  | 1.033  | 0.378    | 0.877         | 1.243         | 0.151           |
| -75            | 1.285  | 1.321  | 0.700    | 1.212         | 1.536         | 0.518           |
| -50            | 1.592  | 1.605  | 1.017    | 1.541         | 1.824         | 0.879           |
| -25            | 1.895  | 1.885  | 1.331    | 1.865         | 2.110         | 1.235           |
| 0              | 2.194  | 2.162  | 1.642    | 2.186         | 2.392         | 1.588           |
| 25             | 2.492  | 2.436  | 1.951    | 2.504         | 2.673         | 1.939           |
| 50             | 2.788  | 2.707  | 2.259    | 2.822         | 2.952         | 2.290           |
| 75             | 3.085  | 2.977  | 2.569    | 3.140         | 3.230         | 2.642           |
| 100            | 3.384  | 3.247  | 2.880    | 3.460         | 3.508         | 2.996           |
| 125            | 3.687  | 3.516  | 3.195    | 3.784         | 3.787         | 3.355           |
| 150            | 3.995  | 3.786  | 3.515    | 4.115         | 4.068         | 3.721           |
| 175            | 4.311  | 4.058  | 3.843    | 4.455         | 4.352         | 4.096           |
| 200            | 4.639  | 4.333  | 4.181    | 4.807         | 4.639         | 4.485           |
| 225            | 4.981  | 4.611  | 4.534    | 5.176         | 4.931         | 4.891           |
| 250            | 5.341  | 4.893  | 4.903    | 5.564         | 5.228         | 5.317           |
| -----          |        |        |          |               |               |                 |
| R <sup>2</sup> |        |        |          | 1.000         | 1.000         | 1.000           |
| MSE            |        |        |          | 0.020         | 0.061         | 0.078           |
| RMSE           |        |        |          | 0.140         | 0.246         | 0.280           |
| MAE            |        |        |          | 0.119         | 0.243         | 0.238           |

**Table S17.** Calculated and fitted NICS(0) values using the additivity effect for doubly and triply substituted benzoic acid derivatives with no external electric field. The fitted values were obtained using Eqs. (10) and (11) with  $a_{m1}=a_{m2}=0.9$  and  $a_p=1.0$ . Also shown are statistical analysis results in the bottom row of the table.

| Molecule           | Calculated | Molecule           | Calculated | Molecule                | Calculated | Fitted  | Molecule                              | Calculated | Fitted |
|--------------------|------------|--------------------|------------|-------------------------|------------|---------|---------------------------------------|------------|--------|
| H                  | -7.137     | 4-NH <sub>2</sub>  | -6.622     | 3,5-Cl                  | -8.184     | -8.271  | 3-NH <sub>2</sub> -5-CN               | -7.806     | -7.776 |
| 3-F                | -9.179     | 4-NMe <sub>2</sub> | -8.969     | 3,5-Me                  | -6.922     | -6.948  | 3-NH <sub>2</sub> -5-F                | -8.976     | -9.157 |
| 3-Br               | -7.497     | 4-NO <sub>2</sub>  | -8.461     | 3,5-NH <sub>2</sub>     | -7.097     | -7.398  | 3-NH <sub>2</sub> -5-Me               | -7.050     | -7.182 |
| 3-Cl               | -7.760     | 4-OEt              | -7.769     | 3,5-NMe <sub>2</sub>    | -7.548     | -7.772  | 3-NH <sub>2</sub> -5-NMe <sub>2</sub> | -7.324     | -7.574 |
| 3-Me               | -7.041     | 4-OH               | -7.820     | 3,5-NO <sub>2</sub>     | -9.743     | -9.466  | 3-NH <sub>2</sub> -5-NO <sub>2</sub>  | -8.558     | -8.458 |
| 3-NH <sub>2</sub>  | -7.301     | 4-OMe              | -7.830     | 3,5-OEt                 | -9.225     | -9.119  | 3-NH <sub>2</sub> -5-OEt              | -8.150     | -8.317 |
| 3-NMe <sub>2</sub> | -7.521     | 5-F                | -9.217     | 3,5-OH                  | -9.218     | -9.386  | 3-NH <sub>2</sub> -5-OMe              | -8.135     | -8.364 |
| 3-NO <sub>2</sub>  | -8.422     | 5-Br               | -7.469     | 3-Cl-5-CN               | -8.191     | -8.188  | 3-NMe <sub>2</sub> -5-Cl              | -7.975     | -8.056 |
| 3-OEt              | -8.193     | 5-Cl               | -7.775     | 3-Cl-5-NO <sub>2</sub>  | -8.958     | -8.871  | 3-NMe <sub>2</sub> -5-CN              | -8.050     | -7.973 |
| 3-OH               | -8.370     | 5-Me               | -7.023     | 3-F-5-Cl                | -9.709     | -9.548  | 3-NMe <sub>2</sub> -5-F               | -9.243     | -9.355 |
| 3-CN               | -7.699     | 5-NH <sub>2</sub>  | -7.263     | 3-F-5-CN                | -9.652     | -9.466  | 3-NMe <sub>2</sub> -5-Me              | -7.368     | -7.380 |
| 3-OMe              | -9.787     | 5-NMe <sub>2</sub> | -7.459     | 3-F-5-NO <sub>2</sub>   | -10.452    | -10.148 | 3-NMe <sub>2</sub> -5-NO <sub>2</sub> | -8.715     | -8.656 |
| 4-F                | -8.832     | 5-NO <sub>2</sub>  | -8.441     | 3-Me-5-Cl               | -7.623     | -7.624  | 3-NO <sub>2</sub> -5-CN               | -8.994     | -8.784 |
| 4-CN               | -7.769     | 5-OEt              | -8.284     | 3-Me-5-CN               | -7.621     | -7.541  | 3-OEt-5-Cl                            | -8.755     | -8.661 |
| 4-Br               | -7.230     | 5-OH               | -8.404     | 3-Me-5-F                | -8.981     | -8.923  | 3-OEt-5-CN                            | -8.812     | -8.578 |
| 4-Cl               | -7.497     | 5-OMe              | -8.337     | 3-Me-5-NO <sub>2</sub>  | -8.370     | -8.224  | 3-OEt-5-F                             | -10.147    | -9.959 |
| 4-Me               | -6.863     | 5-CN               | -7.683     | 3-NH <sub>2</sub> -5-Cl | -7.682     | -7.859  | 3-OEt-5-Me                            | -8.014     | -7.984 |

Continued

| Molecule                 | Calculated | Fitted  | Molecule                | Calculated | Fitted  | Molecule                              | Calculated | Fitted  | Molecule                  | Calculated | Fitted |
|--------------------------|------------|---------|-------------------------|------------|---------|---------------------------------------|------------|---------|---------------------------|------------|--------|
| 3-OEt-5-NMe <sub>2</sub> | -8.321     | -8.377  | 4-Cl-5-NMe <sub>2</sub> | -8.025     | -7.787  | 4-F-5-OMe                             | -10.014    | -9.911  | 4-OEt-5-Cl                | -8.542     | -8.343 |
| 3-OEt-5-NO <sub>2</sub>  | -9.629     | -9.260  | 4-Cl-5-NO <sub>2</sub>  | -8.928     | -8.670  | 4-Me-5-Cl                             | -7.550     | -7.437  | 4-OEt-5-CN                | -8.036     | -8.260 |
| 3-OH-5-Cl                | -8.752     | -8.820  | 4-Cl-5-OEt              | -8.575     | -8.529  | 4-Me-5-CN                             | -7.277     | -7.354  | 4-OEt-5-F                 | -9.975     | -9.641 |
| 3-OH-5-CN                | -8.861     | -8.738  | 4-Cl-5-OH               | -8.662     | -8.637  | 4-Me-5-F                              | -8.949     | -8.735  | 4-OEt-5-Me                | -7.908     | -7.666 |
| 3-OH-5-F                 | -10.163    | -10.119 | 4-Cl-5-OMe              | -8.569     | -8.577  | 4-Me-5-NH <sub>2</sub>                | -7.410     | -6.976  | 4-OH-5-Cl                 | -8.414     | -8.394 |
| 3-OH-5-Me                | -8.069     | -8.144  | 4-CN-5-Cl               | -8.018     | -8.342  | 4-Me-5-NMe <sub>2</sub>               | -7.530     | -7.153  | 4-OH-5-CN                 | -8.102     | -8.311 |
| 3-OH-5-NH <sub>2</sub>   | -8.107     | -8.360  | 4-CN-5-F                | -9.465     | -9.641  | 4-Me-5-NO <sub>2</sub>                | -8.425     | -8.036  | 4-OH-5-F                  | -10.047    | -9.692 |
| 3-OH-5-NMe <sub>2</sub>  | -8.302     | -8.536  | 4-CN-5-Me               | -7.520     | -7.666  | 4-Me-5-OEt                            | -8.113     | -7.895  | 4-OH-5-Me                 | -7.750     | -7.718 |
| 3-OH-5-NO <sub>2</sub>   | -9.598     | -9.420  | 4-CN-5-NMe <sub>2</sub> | -7.741     | -8.058  | 4-Me-5-OH                             | -8.197     | -8.003  | 4-OH-5-OEt                | -9.236     | -8.853 |
| 3-OH-5-OEt               | -9.183     | -9.279  | 4-CN-5-NO <sub>2</sub>  | -9.038     | -8.942  | 4-Me-5-OMe                            | -8.134     | -7.943  | 4-OH-5-OMe                | -9.223     | -8.900 |
| 3-OH-5-OMe               | -9.160     | -9.326  | 4-CN-5-OEt              | -8.496     | -8.801  | 4-NH <sub>2</sub> -5-Cl               | -7.443     | -7.196  | 4-OMe-5-Cl                | -8.624     | -8.403 |
| 4,5-Cl                   | -7.825     | -8.071  | 4-CN-5-OMe              | -8.525     | -8.848  | 4-NH <sub>2</sub> -5-F                | -9.156     | -8.494  | 4-OMe-5-CN                | -8.075     | -8.321 |
| 4,5-Me                   | -6.876     | -6.760  | 4-F-5-Cl                | -9.252     | -9.405  | 4-NH <sub>2</sub> -5-Me               | -6.898     | -6.519  | 4-OMe-5-F                 | -10.205    | -9.702 |
| 4,5-OEt                  | -9.462     | -8.801  | 4-F-5-CN                | -9.052     | -9.322  | 4-NO <sub>2</sub> -5-Cl               | -9.151     | -9.034  | 4-OMe-5-Me                | -7.846     | -7.727 |
| 4,5-OH                   | -9.513     | -8.960  | 4-F-5-Me                | -8.686     | -8.729  | 4-NO <sub>2</sub> -5-CN               | -9.039     | -8.951  | 4-OMe-5-NMe <sub>2</sub>  | -8.597     | -8.119 |
| 4,5-OMe                  | -9.488     | -8.909  | 4-F-5-NH <sub>2</sub>   | -9.378     | -8.945  | 4-NO <sub>2</sub> -5-F                | -10.462    | -10.333 | 4-OMe-5-NO <sub>2</sub>   | -9.376     | -9.003 |
| 4-Cl-5-CN                | -7.712     | -7.988  | 4-F-5-NMe <sub>2</sub>  | -9.428     | -9.121  | 4-NO <sub>2</sub> -5-Me               | -8.585     | -8.358  | 4-OMe-5-OH                | -9.476     | -8.970 |
| 4-Cl-5-F                 | -9.318     | -9.369  | 4-F-5-NO <sub>2</sub>   | -10.091    | -10.004 | 4-NO <sub>2</sub> -5-NMe <sub>2</sub> | -9.148     | -8.750  | 3,4,5-Me                  | -6.747     | -6.674 |
| 4-Cl-5-Me                | -7.434     | -7.394  | 4-F-5-OEt               | -10.029    | -9.864  | 4-NO <sub>2</sub> -5-OEt              | -9.746     | -9.493  | 3,5-Cl-4-OH               | -8.837     | -8.954 |
| 4-Cl-5-NH <sub>2</sub>   | -7.848     | -7.610  | 4-F-5-OH                | -10.191    | -9.971  | 4-NO <sub>2</sub> -5-OMe              | -9.758     | -9.540  | 3,5-NO <sub>2</sub> -4-Cl | -10.495    | -9.826 |
| R <sup>2</sup>           |            | 0.933   | MSE                     |            | 0.065   | RMSE                                  |            | 0.255   | MAE                       |            | 0.207  |

**Table S18.** Calculated and fitted Shannon entropy values applying this sum rule in Eqs. (10) and (11) for doubly and triply fluorine-substituted benzoic acid derivatives under external electric field along x axis. Also shown are statistical analysis results in the bottom four rows of the table.

| <b>EF</b>            | <b>3,4-F</b> | <b>3,5-F</b> | <b>3,4,5-F</b> | <b>Fitted 3,4-F</b> | <b>Fitted 3,5-F</b> | <b>Fitted 3,4,5-F</b> |
|----------------------|--------------|--------------|----------------|---------------------|---------------------|-----------------------|
| -250                 | 46.852       | 46.840       | 43.455         | 47.452              | 46.492              | 43.860                |
| -225                 | 46.799       | 46.789       | 43.407         | 47.399              | 46.441              | 43.812                |
| -200                 | 46.753       | 46.745       | 43.364         | 47.352              | 46.397              | 43.769                |
| -175                 | 46.713       | 46.707       | 43.328         | 47.312              | 46.360              | 43.733                |
| -150                 | 46.680       | 46.675       | 43.298         | 47.278              | 46.328              | 43.702                |
| -125                 | 46.652       | 46.649       | 43.273         | 47.250              | 46.302              | 43.677                |
| -100                 | 46.630       | 46.628       | 43.253         | 47.228              | 46.281              | 43.657                |
| -75                  | 46.614       | 46.613       | 43.239         | 47.211              | 46.267              | 43.643                |
| -50                  | 46.602       | 46.604       | 43.230         | 47.200              | 46.257              | 43.634                |
| -25                  | 46.597       | 46.600       | 43.227         | 47.194              | 46.253              | 43.631                |
| 0                    | 46.596       | 46.602       | 43.228         | 47.194              | 46.255              | 43.632                |
| 25                   | 46.601       | 46.608       | 43.235         | 47.198              | 46.262              | 43.639                |
| 50                   | 46.611       | 46.621       | 43.247         | 47.209              | 46.274              | 43.652                |
| 75                   | 46.627       | 46.639       | 43.265         | 47.224              | 46.292              | 43.669                |
| 100                  | 46.648       | 46.662       | 43.288         | 47.245              | 46.315              | 43.692                |
| 125                  | 46.674       | 46.691       | 43.316         | 47.271              | 46.345              | 43.721                |
| 150                  | 46.706       | 46.727       | 43.350         | 47.303              | 46.379              | 43.755                |
| 175                  | 46.743       | 46.768       | 43.390         | 47.341              | 46.420              | 43.795                |
| 200                  | 46.787       | 46.815       | 43.436         | 47.385              | 46.468              | 43.841                |
| 225                  | 46.837       | 46.869       | 43.489         | 47.435              | 46.522              | 43.893                |
| 250                  | 46.894       | 46.930       | 43.548         | 47.491              | 46.583              | 43.953                |
| <b>R<sup>2</sup></b> |              |              |                | 1.000               | 1.000               | 1.000                 |
| <b>MSE</b>           |              |              |                | 0.358               | 0.120               | 0.164                 |
| <b>RMSE</b>          |              |              |                | 0.598               | 0.347               | 0.404                 |
| <b>MAE</b>           |              |              |                | 0.598               | 0.347               | 0.404                 |

**Table S19.** Calculated and fitted Shannon entropy values applying this sum rule in Eqs. (10) and (11) for doubly and triply fluorine-substituted benzoic acid derivatives under external electric field along y axis. Also shown are statistical analysis results in the bottom four rows of the table.

| <b>EF</b>            | <b>3,4-F</b> | <b>3,5-F</b> | <b>3,4,5-F</b> | <b>Fitted 3,4-F</b> | <b>Fitted 3,5-F</b> | <b>Fitted 3,4,5-F</b> |
|----------------------|--------------|--------------|----------------|---------------------|---------------------|-----------------------|
| -250                 | 46.852       | 46.840       | 43.455         | 47.452              | 46.492              | 43.860                |
| -225                 | 46.799       | 46.789       | 43.407         | 47.399              | 46.441              | 43.812                |
| -200                 | 46.753       | 46.745       | 43.364         | 47.352              | 46.397              | 43.769                |
| -175                 | 46.713       | 46.707       | 43.328         | 47.312              | 46.360              | 43.733                |
| -150                 | 46.680       | 46.675       | 43.298         | 47.278              | 46.328              | 43.702                |
| -125                 | 46.652       | 46.649       | 43.273         | 47.250              | 46.302              | 43.677                |
| -100                 | 46.630       | 46.628       | 43.253         | 47.228              | 46.281              | 43.657                |
| -75                  | 46.614       | 46.613       | 43.239         | 47.211              | 46.267              | 43.643                |
| -50                  | 46.602       | 46.604       | 43.230         | 47.200              | 46.257              | 43.634                |
| -25                  | 46.597       | 46.600       | 43.227         | 47.194              | 46.253              | 43.631                |
| 0                    | 46.596       | 46.602       | 43.228         | 47.194              | 46.255              | 43.632                |
| 25                   | 46.601       | 46.608       | 43.235         | 47.198              | 46.262              | 43.639                |
| 50                   | 46.611       | 46.621       | 43.247         | 47.209              | 46.274              | 43.652                |
| 75                   | 46.627       | 46.639       | 43.265         | 47.224              | 46.292              | 43.669                |
| 100                  | 46.648       | 46.662       | 43.288         | 47.245              | 46.315              | 43.692                |
| 125                  | 46.674       | 46.691       | 43.316         | 47.271              | 46.345              | 43.721                |
| 150                  | 46.706       | 46.727       | 43.350         | 47.303              | 46.379              | 43.755                |
| 175                  | 46.743       | 46.768       | 43.390         | 47.341              | 46.420              | 43.795                |
| 200                  | 46.787       | 46.815       | 43.436         | 47.385              | 46.468              | 43.841                |
| 225                  | 46.837       | 46.869       | 43.489         | 47.435              | 46.522              | 43.893                |
| 250                  | 46.894       | 46.930       | 43.548         | 47.491              | 46.583              | 43.953                |
| <b>R<sup>2</sup></b> |              |              |                | 0.998               | 0.998               | 1.000                 |
| <b>MSE</b>           |              |              |                | 0.357               | 0.121               | 0.163                 |
| <b>RMSE</b>          |              |              |                | 0.597               | 0.348               | 0.403                 |
| <b>MAE</b>           |              |              |                | 0.597               | 0.348               | 0.403                 |

**Table S20.** Calculated and fitted Shannon entropy values applying this sum rule in Eqs. (10) and (11) for doubly and triply cyano-substituted benzoic acid derivatives under external electric field along x axis. Also shown are statistical analysis results in the bottom four rows of the table.

| EF             | 3,4-CN | 3,5-CN | 3,4,5-CN | Fitted 3,4-CN | Fitted 3,5-CN | Fitted 3,4,5-CN |
|----------------|--------|--------|----------|---------------|---------------|-----------------|
| -250           | 65.917 | 65.985 | 72.124   | 64.655        | 63.236        | 69.470          |
| -225           | 65.853 | 65.910 | 72.047   | 64.597        | 63.168        | 69.404          |
| -200           | 65.798 | 65.846 | 71.981   | 64.547        | 63.109        | 69.346          |
| -175           | 65.750 | 65.790 | 71.924   | 64.503        | 63.058        | 69.296          |
| -150           | 65.711 | 65.744 | 71.876   | 64.467        | 63.016        | 69.254          |
| -125           | 65.678 | 65.706 | 71.837   | 64.437        | 62.981        | 69.219          |
| -100           | 65.653 | 65.676 | 71.806   | 64.414        | 62.954        | 69.192          |
| -75            | 65.634 | 65.654 | 71.783   | 64.397        | 62.933        | 69.172          |
| -50            | 65.622 | 65.639 | 71.767   | 64.386        | 62.920        | 69.158          |
| -25            | 65.617 | 65.632 | 71.760   | 64.382        | 62.914        | 69.152          |
| 0              | 65.618 | 65.632 | 71.760   | 64.383        | 62.914        | 69.152          |
| 25             | 65.625 | 65.640 | 71.767   | 64.391        | 62.922        | 69.160          |
| 50             | 65.639 | 65.655 | 71.783   | 64.405        | 62.936        | 69.174          |
| 75             | 65.660 | 65.678 | 71.806   | 64.425        | 62.958        | 69.195          |
| 100            | 65.687 | 65.708 | 71.837   | 64.451        | 62.986        | 69.223          |
| 125            | 65.721 | 65.746 | 71.876   | 64.484        | 63.022        | 69.258          |
| 150            | 65.762 | 65.793 | 71.923   | 64.523        | 63.065        | 69.301          |
| 175            | 65.810 | 65.848 | 71.980   | 64.569        | 63.117        | 69.352          |
| 200            | 65.865 | 65.912 | 72.045   | 64.623        | 63.176        | 69.410          |
| 225            | 65.929 | 65.985 | 72.121   | 64.683        | 63.245        | 69.478          |
| 250            | 66.001 | 66.069 | 72.206   | 64.753        | 63.323        | 69.555          |
| R <sup>2</sup> |        |        |          | 0.998         | 1.000         | 0.999           |
| MSE            |        |        |          | 1.542         | 7.443         | 6.882           |
| RMSE           |        |        |          | 1.242         | 2.728         | 2.623           |
| MAE            |        |        |          | 1.242         | 2.728         | 2.623           |

**Table S21.** Calculated and fitted Shannon entropy values applying this sum rule in Eqs. (10) and (11) for doubly and triply cyano-substituted benzoic acid derivatives under external electric field along y axis. Also shown are statistical analysis results in the bottom four rows of the table.

| EF             | 3,4-CN | 3,5-CN | 3,4,5-CN | Fitted 3,4-CN | Fitted 3,5-CN | Fitted 3,4,5-CN |
|----------------|--------|--------|----------|---------------|---------------|-----------------|
| -250           | 65.917 | 65.985 | 72.124   | 64.655        | 63.236        | 69.470          |
| -225           | 65.853 | 65.910 | 72.047   | 64.597        | 63.168        | 69.404          |
| -200           | 65.798 | 65.846 | 71.981   | 64.547        | 63.109        | 69.346          |
| -175           | 65.750 | 65.790 | 71.924   | 64.503        | 63.058        | 69.296          |
| -150           | 65.711 | 65.744 | 71.876   | 64.467        | 63.016        | 69.254          |
| -125           | 65.678 | 65.706 | 71.837   | 64.437        | 62.981        | 69.219          |
| -100           | 65.653 | 65.676 | 71.806   | 64.414        | 62.954        | 69.192          |
| -75            | 65.634 | 65.654 | 71.783   | 64.397        | 62.933        | 69.172          |
| -50            | 65.622 | 65.639 | 71.767   | 64.386        | 62.920        | 69.158          |
| -25            | 65.617 | 65.632 | 71.760   | 64.382        | 62.914        | 69.152          |
| 0              | 65.618 | 65.632 | 71.760   | 64.383        | 62.914        | 69.152          |
| 25             | 65.625 | 65.640 | 71.767   | 64.391        | 62.922        | 69.160          |
| 50             | 65.639 | 65.655 | 71.783   | 64.405        | 62.936        | 69.174          |
| 75             | 65.660 | 65.678 | 71.806   | 64.425        | 62.958        | 69.195          |
| 100            | 65.687 | 65.708 | 71.837   | 64.451        | 62.986        | 69.223          |
| 125            | 65.721 | 65.746 | 71.876   | 64.484        | 63.022        | 69.258          |
| 150            | 65.762 | 65.793 | 71.923   | 64.523        | 63.065        | 69.301          |
| 175            | 65.810 | 65.848 | 71.980   | 64.569        | 63.117        | 69.352          |
| 200            | 65.865 | 65.912 | 72.045   | 64.623        | 63.176        | 69.410          |
| 225            | 65.929 | 65.985 | 72.121   | 64.683        | 63.245        | 69.478          |
| 250            | 66.001 | 66.069 | 72.206   | 64.753        | 63.323        | 69.555          |
| R <sup>2</sup> |        |        |          | 1.000         | 0.998         | 1.000           |
| MSE            |        |        |          | 1.523         | 7.401         | 6.788           |
| RMSE           |        |        |          | 1.234         | 2.720         | 2.605           |
| MAE            |        |        |          | 1.234         | 2.720         | 2.605           |



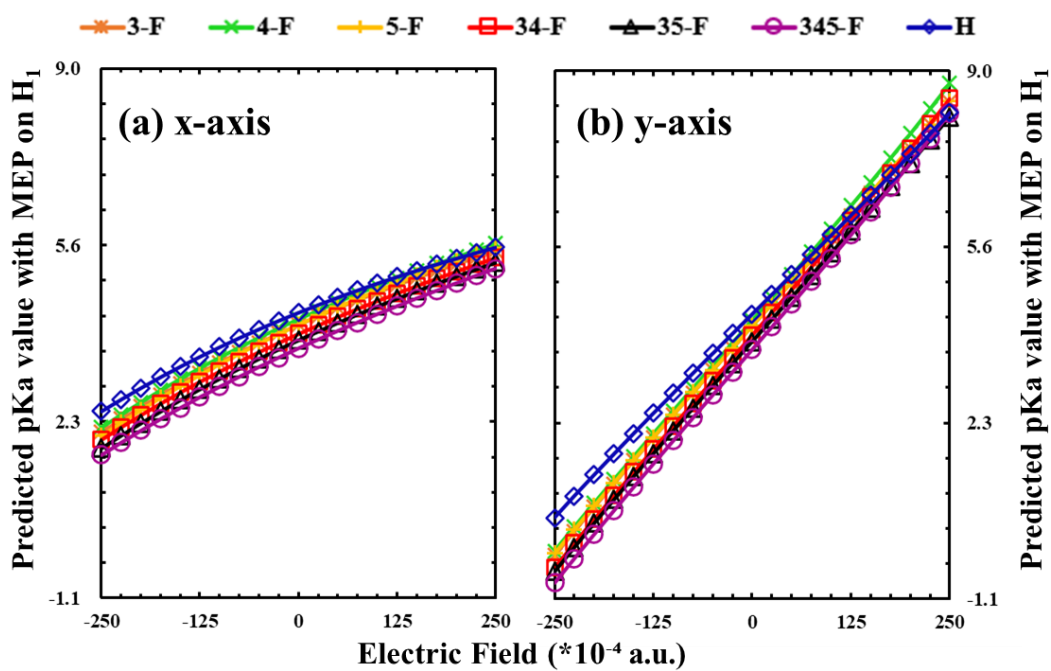

**Figure S1.** Profiles of calculated  $pK_a$  values using MEP from  $H_1$  in Scheme 1 for fluorine-substituted benzoic acid derivatives as a function of the strength of the applied external electric field along (a) x-axis; and (b) y-axis.

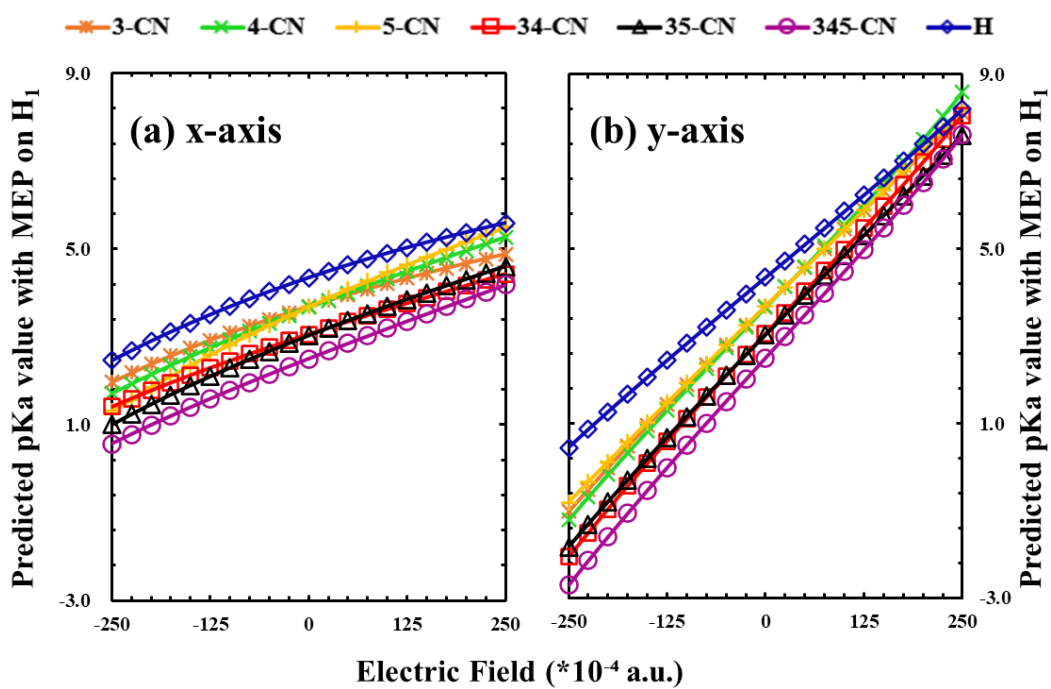

**Figure S2.** Profiles of calculated pK<sub>a</sub> values using MEP from H<sub>1</sub> in Scheme 1 for cyano-substituted benzoic acid derivatives as a function of the strength of the applied external electric field along (a) x-axis; and (b) y-axis.

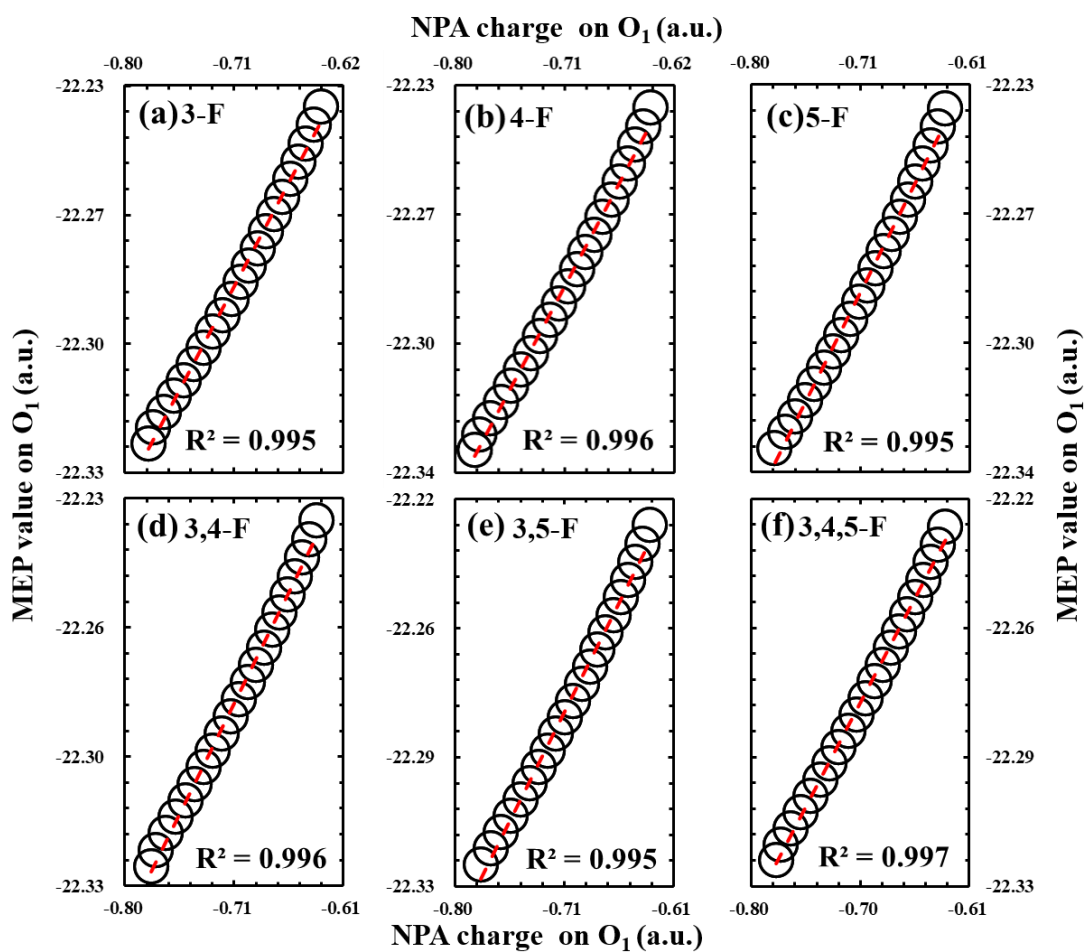

**Figure S3.** Strong linear correlations of MEP values with NPA partial charges on O<sub>1</sub> in Scheme 1 for fluorine-substituted benzoic acid derivatives for when the external electric field is applied to x-axis.

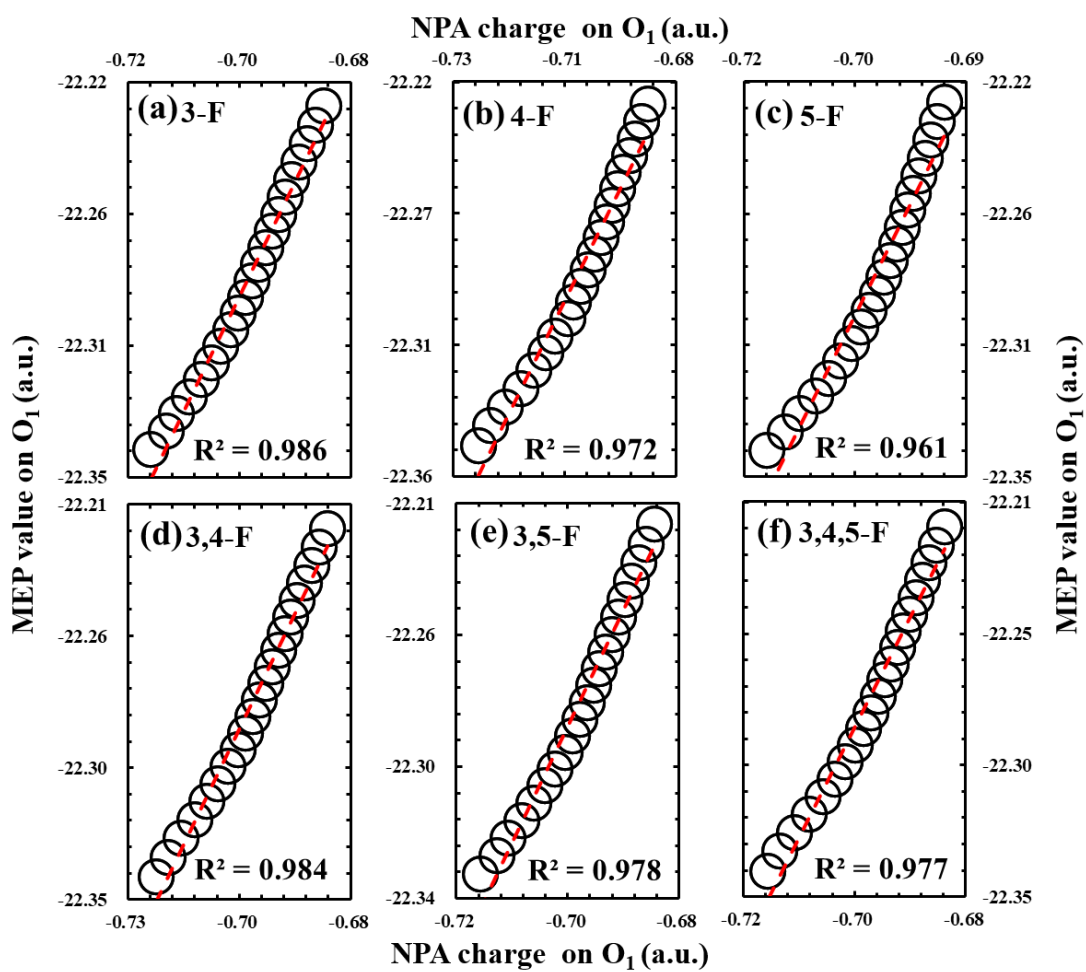

**Figure S4.** Strong linear correlations of MEP values with NPA partial charges on O<sub>1</sub> in Scheme 1 for fluorine-substituted benzoic acid derivatives for when the external electric field is applied to y-axis.

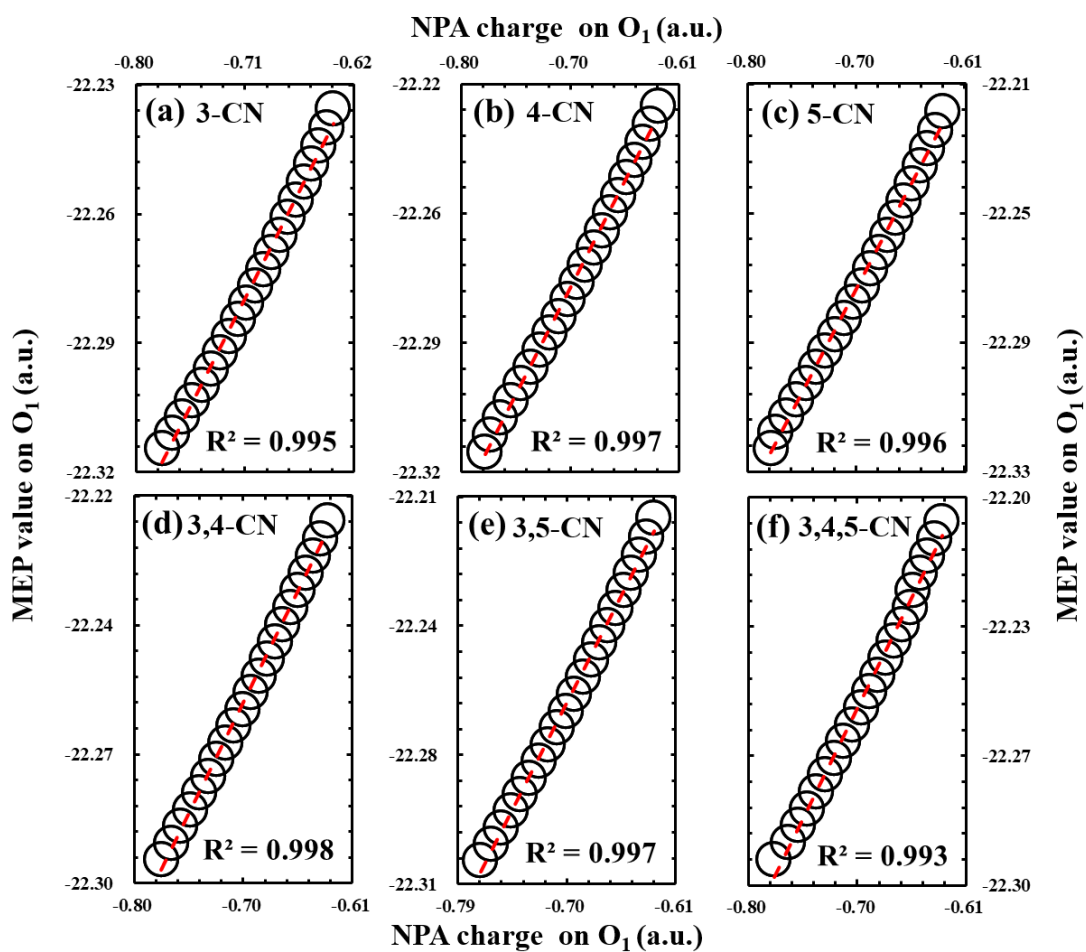

**Figure S5.** Strong linear correlations of MEP values with NPA partial charges on O<sub>1</sub> in Scheme 1 for cyano-substituted benzoic acid derivatives for when the external electric field is applied to x-axis.

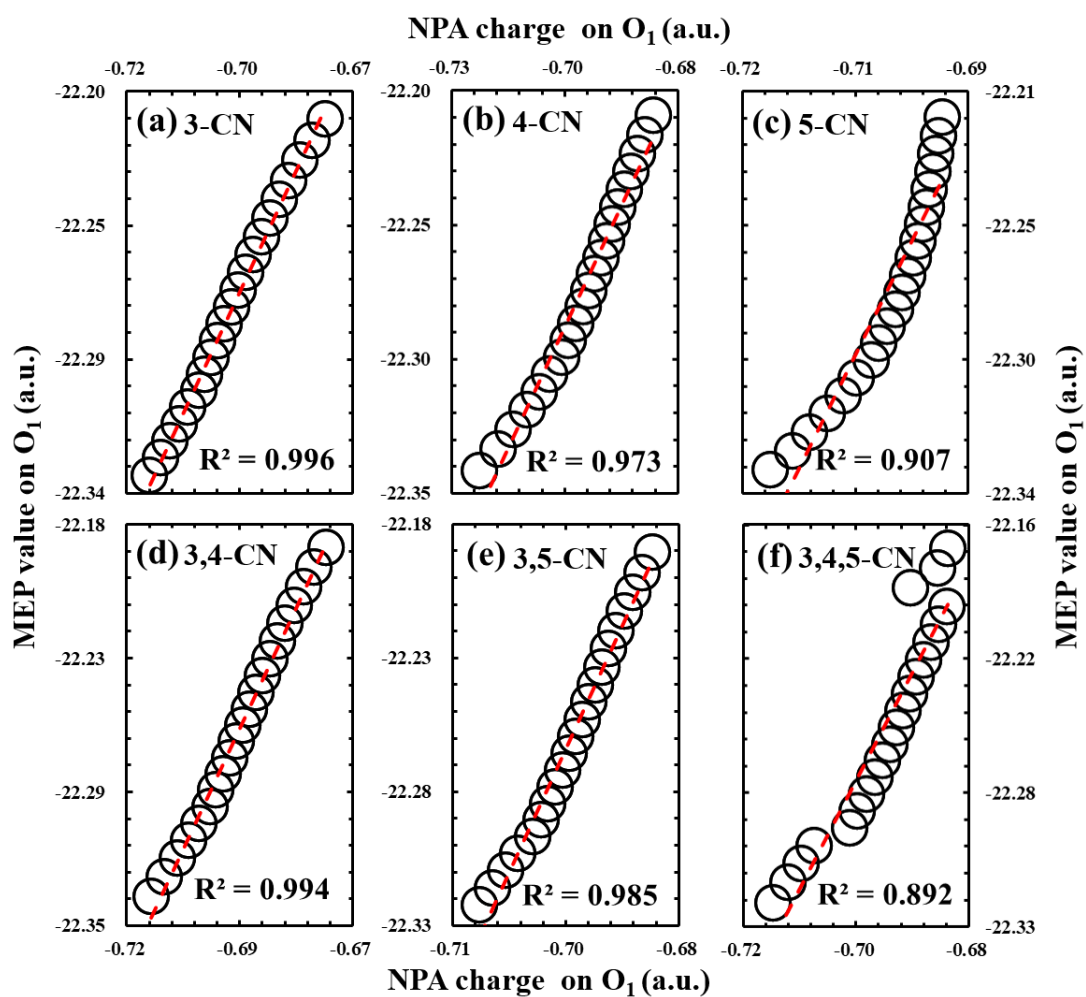

**Figure S6.** Strong linear correlations of MEP values with NPA partial charges on O<sub>1</sub> in Scheme 1 for cyano-substituted benzoic acid derivatives for when the external electric field is applied to y-axis.

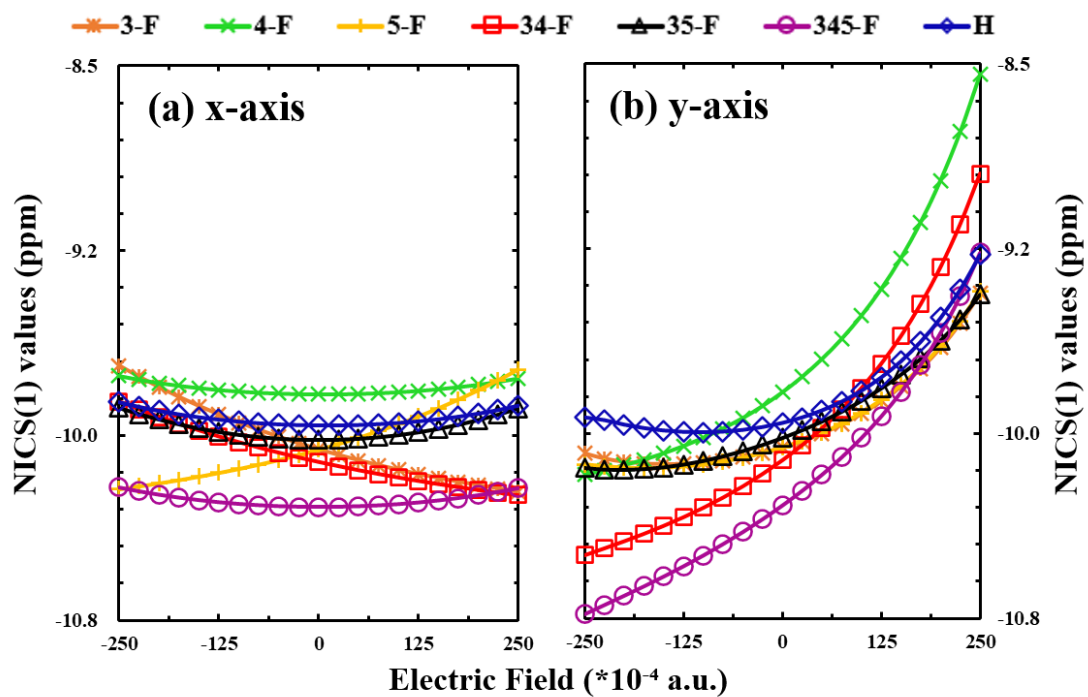

**Figure S7.** Profiles of the calculated aromaticity index, NICS(1), for singly, doubly, and triply fluorine-substituted benzoic acid derivatives as a function of the strength of the applied external electric field along (a) x-axis; and (b) y-axis.

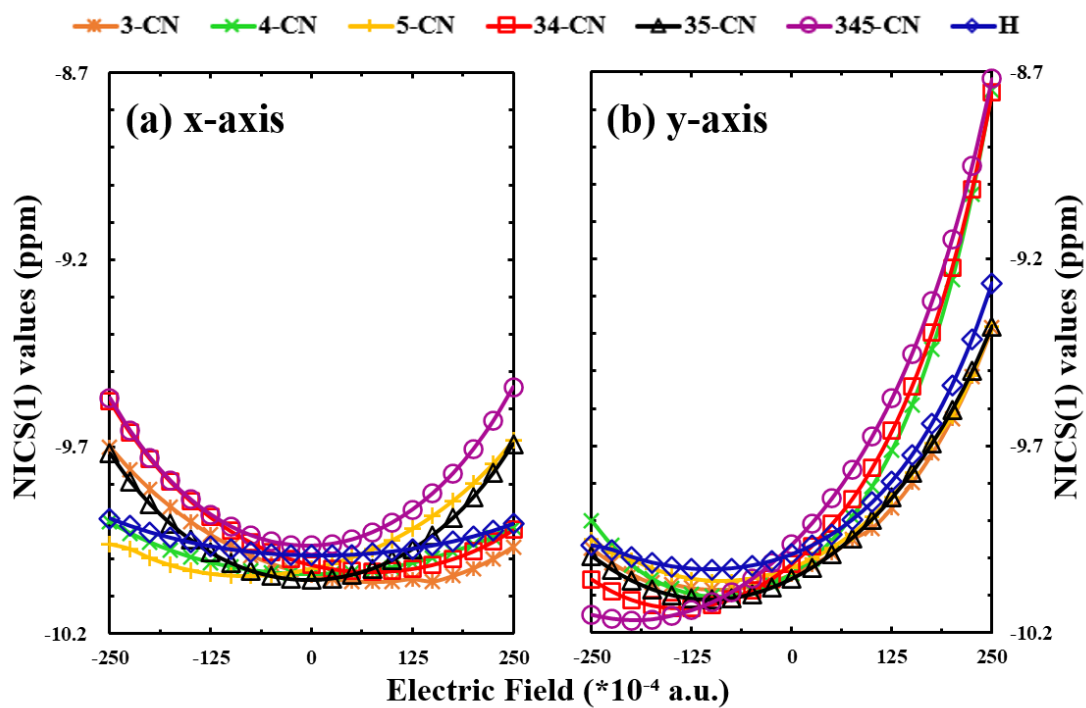

**Figure S8.** Profiles of the calculated aromaticity index, NICS(1), for singly, doubly, and triply cyano-substituted benzoic acid derivatives as a function of the strength of the applied external electric field along (a) x-axis; and (b) y-axis.



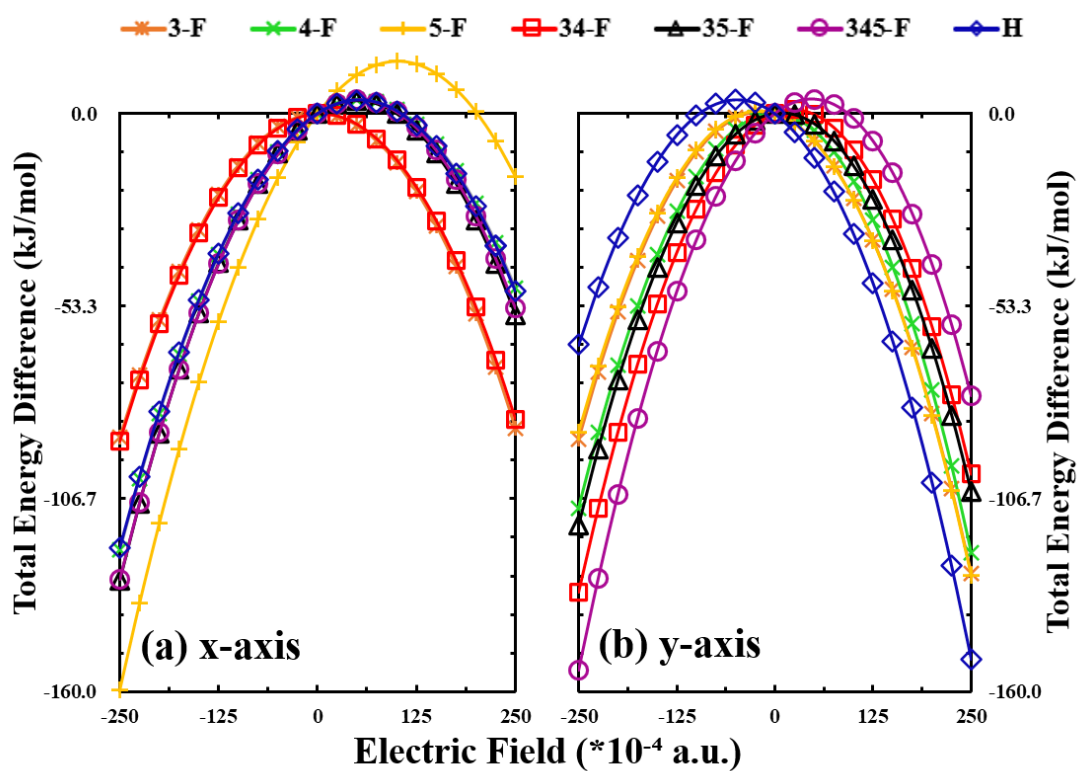

**Figure S9.** Profiles of the total energy change for singly, doubly, and triply fluorine-substituted benzoic acid derivatives as a function of the strength of the applied external electric field along (a) x-axis; and (b) y-axis. The reference is the zero electric field.

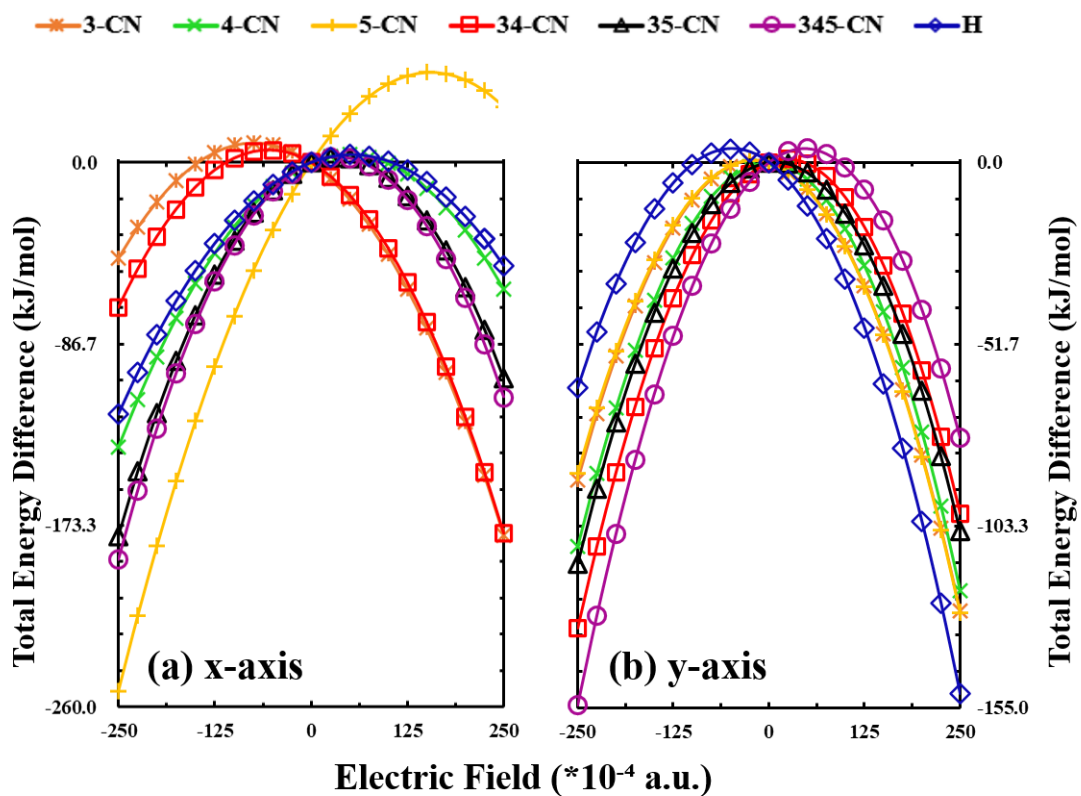

**Figure S10.** Profiles of the total energy change for singly, doubly, and triply cyano-substituted benzoic acid derivatives as a function of the strength of the applied external electric field along (a) x-axis; and (b) y-axis. The reference is the zero electric field.

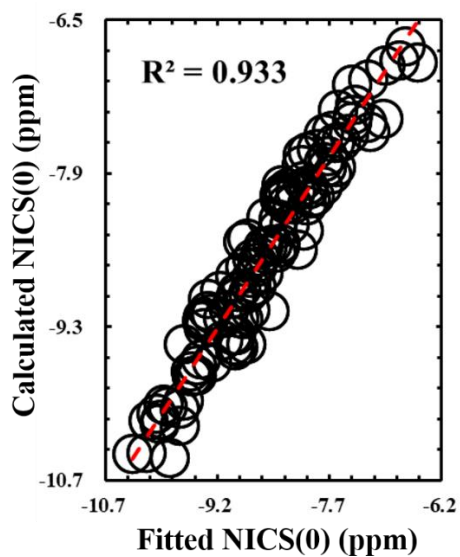

**Figure S11.** Strong linear correlations of calculated and fitted NICS(0) values for doubly and triply substituted benzoic acid derivatives with no external electric field applied. The fitted NICS(0) values were obtained using Eqs. (10) and (11) with  $a_{m1}=a_{m2}=0.9$  and  $a_p=1.0$ .
